# Supplementary material for: A Severe Gastroenteritis Outbreak of Salmonella enterica Serovar Enteritidis Linked to Contaminated Egg Fried Rice, China, 2021
Source: Front Microbiol. 2021 Nov 22;12:779749. doi: 10.3389/fmicb.2021.779749 (PMC8645860; doi:10.3389/fmicb.2021.779749)
Supplement: Supplementary file 2 [file Table_1.xlsx]

## Sheet: Sheet1
Supplementary Table S1. Sample detection and identification results.
Sample No.	Sample type	Salmonella RT-PCR test results	Results of isolation and culture of Salmonella
WJ002	Anal swab	negative
WJ003	Anal swab	negative
WJ005	Anal swab	positive
WJ005	Anal swab	positive	+
WJ006	Anal swab	negative
WJ007	Anal swab	positive	+
WJ008	Anal swab	negative
WJ009	Anal swab	positive	+
WJ010	Anal swab	positive	+
WJ152	Egg samples	negative
WJ153	Egg samples	negative
WJ154	Egg samples	weakly positive
WJ155	Egg samples	negative
WJ156	Egg samples	negative
WJ157	Egg samples	negative
WJ158	Egg samples	weakly positive
WJ159	Egg samples	weakly positive
WJ160	Egg samples	weakly positive
WJ161	Egg samples	weakly positive
WJ162	Egg samples	weakly positive
WJ163	Egg samples	weakly positive
WJ164	Egg samples	weakly positive
WJ001	Stool sample	positive	+
WJ011	Stool sample	positive	+
WJ012	Stool sample	positive	+
WJ013	Stool sample	positive
WJ014	Stool sample	positive
WJ015	Stool sample	positive
WJ016	Stool sample	negative
WJ017	Stool sample	negative
WJ018	Stool sample	positive	+
WJ019	Stool sample	positive
WJ020	Stool sample	positive	+
WJ021	Stool sample	positive	+
WJ022	Stool sample	positive
WJ023	Stool sample	positive
WJ024	Stool sample	positive
WJ025	Stool sample	positive	+
WJ026	Stool sample	positive	+
WJ027	Stool sample	positive	+
WJ028	Stool sample	positive	+
WJ029	Stool sample	positive	+
WJ030	Stool sample	positive
WJ031	Stool sample	positive	+
WJ032	Stool sample	positive	+
WJ033	Stool sample	positive
WJ034	Stool sample	positive
WJ035	Stool sample	positive
WJ036	Stool sample	positive
WJ037	Stool sample	positive
WJ038	Stool sample	positive
WJ039	Stool sample	positive
WJ040	Stool sample	positive	+
WJ041	Stool sample	positive
WJ042	Stool sample	positive
WJ043	Stool sample	positive
WJ044	Stool sample	positive
WJ120	Stool sample	weakly positive
WJ121	Stool sample	negative
WJ122	Stool sample	negative
WJ123	Stool sample	weakly positive
WJ124	Stool sample	negative
WJ125	Stool sample	weakly positive
WJ126	Stool sample	weakly positive
WJ127	Stool sample	weakly positive	+
WJ128	Stool sample	weakly positive
WJ129	Stool sample	negative
WJ130	Stool sample	weakly positive
WJ131	Stool sample	weakly positive
WJ132	Stool sample	weakly positive
WJ133	Stool sample	negative
WJ134	Stool sample	negative
WJ135	Stool sample	weakly positive
WJ136	Stool sample	negative
WJ137	Stool sample	negative
WJ138	Stool sample	weakly positive
WJ139	Stool sample	weakly positive
WJ140	Stool sample	weakly positive
WJ141	Stool sample	negative
WJ142	Stool sample	weakly positive
WJ143	Stool sample	negative
WJ144	Stool sample	negative
WJ145	Stool sample	negative
WJ146	Stool sample	negative
WJ147	Stool sample	weakly positive
WJ148	Stool sample	negative
WJ149	Stool sample	negative
WJ150	Stool sample	weakly positive
WJ151	Stool sample	negative
WJ063	Food sample	negative
WJ060	Egg Fried Rice	positive	+
WJ087	Food sample	negative
WJ106	Food sample	negative
WJ088	Food sample	negative
WJ112	Food sample	negative
WJ096	Food sample	negative
WJ104	Food sample	negative
WJ082	Food sample	negative
WJ077	Food sample	negative
WJ078	Food sample	negative
WJ097	Food sample	negative
WJ103	Food sample	negative
WJ065	Food sample	negative
WJ061	Food sample	negative
WJ052	Food sample	negative
WJ053	Food sample	negative
WJ072	Food sample	negative
WJ090	Food sample	negative
WJ111	Food sample	negative
WJ055	Food sample	negative
WJ068	Food sample	negative
WJ059	Spicy chicken	positive
WJ105	Food sample	negative
WJ050	Food sample	negative
WJ069	Food sample	negative
WJ070	Food sample	negative
WJ071	Food sample	negative
WJ073	Food sample	negative
WJ075	Food sample	negative
WJ079	Food sample	negative
WJ109	Food sample	negative
WJ114	Food sample	negative
WJ117	Food sample	negative
WJ101	Food sample	negative
WJ092	Food sample	negative
WJ051	Food sample	negative
WJ056	Food sample	negative
WJ067	Food sample	negative
WJ081	rice	positive
WJ115	Food sample	negative
WJ118	Food sample	negative
WJ091	Congee with preserved egg and lean meat	positive
WJ093	Food sample	negative
WJ057	Food sample	negative
WJ084	Food sample	negative
WJ062	Food sample	negative
WJ060	Food sample	negative
WJ094	Food sample	negative
WJ083	Food sample	negative
WJ054	Food sample	negative
WJ080	Food sample	negative
WJ089	Food sample	negative
WJ066	Food sample	negative
WJ064	Food sample	negative
WJ085	Food sample	negative
WJ113	Food sample	negative
WJ110	Food sample	negative
WJ098	Food sample	negative
WJ099	Food sample	negative
WJ119	Food sample	negative
WJ074	Food sample	negative
WJ086	Food sample	negative
WJ100	Food sample	negative
WJ116	Food sample	negative
WJ076	Food sample	negative
WJ107	Food sample	negative
WJ108	Food sample	negative
WJ102	Food sample	negative
WJ045	Paste	negative
WJ046	Paste	negative
WJ047	Paste	negative
WJ048	Paste	negative
WJ049	Paste	negative
WJ054	Water sample	negative
