# Supplementary material for: A Severe Gastroenteritis Outbreak of Salmonella enterica Serovar Enteritidis Linked to Contaminated Egg Fried Rice, China, 2021
Source: Front Microbiol. 2021 Nov 22;12:779749. doi: 10.3389/fmicb.2021.779749 (PMC8645860; doi:10.3389/fmicb.2021.779749)
Supplement: Supplementary file 3 [file Table_2.xlsx]

## Sheet: WGS with 533 strains
Supplementary Table S2. Information of the 533 genomes used in this study.
Strain number	serotype	ST	Resistance genes																	adherence genes																										magnesium uptake genes
			blaTEM-115_1	blaTEM-1B_1	blaTEM-1C_1	sul1_2	sul1_5	sul2_2	sul2_21	sul2_3	sul2_6	tet(A)_4	tet(A)_6	tet(B)_2	tet(C)_3	aac(6')-Iaa_1	aph(3'')-Ib_2	aph(3'')-Ib_5	aph(6)-Id_1	csgA	csgB	csgC	csgD	csgE	csgF	csgG	lpfA	lpfB	lpfC	lpfD	lpfE	misL	pefA	pefB	pefC	pefD	ratB	shdA	sinH	fimC	fimD	fimF	fimH	fimI	grvA	mgtB	mgtC	mig-14	rck
WJ001	S. enteritidis	11	.	100	.	.	.	100	.	.	.	.	97.8	.	.	100	.	100	100	100	100	100	100	100	100	100	100	100	100	100	100	100	100	100	100	100	100	99.12	88.14	100	100	100	100	100	.	100	100	100	100
WJ005	S. enteritidis	11	.	100	.	.	.	100	.	.	.	.	97.8	.	.	100	.	100	100	100	100	100	100	100	100	100	100	100	100	100	100	100	100	100	100	100	100	99.12	88.14	100	100	100	100	100	.	100	100	100	100
WJ007	S. enteritidis	11	.	100	.	.	.	100	.	.	.	.	97.8	.	.	100	.	100	100	100	100	100	100	100	100	100	100	100	100	100	100	100	100	100	100	100	100	99.12	88.14	100	100	100	100	100	.	100	100	100	100
WJ009	S. enteritidis	11	.	100	.	.	.	100	.	.	.	.	97.8	.	.	100	.	100	100	100	100	100	100	100	100	100	100	100	100	100	100	100	100	100	100	100	100	99.12	88.14	100	100	100	100	100	.	100	100	100	100
WJ010	S. enteritidis	11	.	100	.	.	.	100	.	.	.	.	97.8	.	.	100	.	100	100	100	100	100	100	100	100	100	100	100	100	100	100	100	100	100	100	100	100	99.12	88.14	100	100	100	100	100	.	100	100	100	100
WJ011	S. enteritidis	11	.	100	.	.	.	100	.	.	.	.	97.8	.	.	100	.	100	100	100	100	100	100	100	100	100	100	100	100	100	100	100	100	100	100	100	100	99.12	88.14	100	100	100	100	100	.	100	100	100	100
WJ012	S. enteritidis	11	.	100	.	.	.	100	.	.	.	.	97.8	.	.	100	.	100	100	100	100	100	100	100	100	100	100	100	100	100	100	100	100	100	100	100	100	99.12	88.14	100	100	100	100	100	.	100	100	100	100
WJ018	S. enteritidis	11	.	100	.	.	.	100	.	.	.	.	97.8	.	.	100	.	100	100	100	100	100	100	100	100	100	100	100	100	100	100	100	100	100	100	100	100	99.12	88.14	100	100	100	100	100	.	100	100	100	100
WJ020	S. enteritidis	11	.	100	.	.	.	100	.	.	.	.	97.8	.	.	100	.	100	100	100	100	100	100	100	100	100	100	100	100	100	100	100	100	100	100	100	100	99.12	88.14	100	100	100	100	100	.	100	100	100	100
WJ021	S. enteritidis	11	.	100	.	.	.	100	.	.	.	.	97.8	.	.	100	.	100	100	100	100	100	100	100	100	100	100	100	100	100	100	100	100	100	100	100	100	99.12	88.14	100	100	100	100	100	.	100	100	100	100
WJ025	S. enteritidis	11	.	100	.	.	.	100	.	.	.	.	97.8	.	.	100	.	100	100	100	100	100	100	100	100	100	100	100	100	100	100	100	100	100	100	100	100	99.12	88.14	100	100	100	100	100	.	100	100	100	100
WJ026	S. enteritidis	11	.	100	.	.	.	100	.	.	.	.	97.8	.	.	100	.	100	100	100	100	100	100	100	100	100	100	100	100	100	100	100	100	100	100	100	100	99.12	88.14	100	100	100	100	100	.	100	100	100	100
WJ027	S. enteritidis	11	.	100	.	.	.	100	.	.	.	.	97.8	.	.	100	.	100	100	100	100	100	100	100	100	100	100	100	100	100	100	100	100	100	100	100	100	99.12	88.14	100	100	100	100	100	.	100	100	100	100
WJ028	S. enteritidis	11	.	100	.	.	.	100	.	.	.	.	97.8	.	.	100	.	100	100	100	100	100	100	100	100	100	100	100	100	100	100	100	100	100	100	100	100	99.12	88.14	100	100	100	100	100	.	100	100	100	100
WJ029	S. enteritidis	11	.	100	.	.	.	100	.	.	.	.	97.8	.	.	100	.	100	100	100	100	100	100	100	100	100	100	100	100	100	100	100	100	100	100	100	100	99.12	88.14	100	100	100	100	100	.	100	100	100	100
WJ031	S. enteritidis	11	.	100	.	.	.	100	.	.	.	.	97.8	.	.	100	.	100	100	100	100	100	100	100	100	100	100	100	100	100	100	100	100	100	100	100	100	99.12	88.14	100	100	100	100	100	.	100	100	100	100
WJ032	S. enteritidis	11	.	100	.	.	.	100	.	.	.	.	97.8	.	.	100	.	100	100	100	100	100	100	100	100	100	100	100	100	100	100	100	100	100	100	100	100	99.12	88.14	100	100	100	100	100	.	100	100	100	100
WJ040	S. enteritidis	11	.	100	.	.	.	100	.	.	.	.	97.8	.	.	100	.	100	100	100	100	100	100	100	100	100	100	100	100	100	100	100	100	100	100	100	100	99.12	88.14	100	100	100	100	100	.	100	100	100	100
WJ060	S. enteritidis	11	.	100	.	.	.	100	.	.	.	.	97.8	.	.	100	.	100	100	100	100	100	100	100	100	100	100	100	100	100	100	100	100	100	100	100	100	99.12	88.14	100	100	100	100	100	.	100	100	100	100
WJ127	S. enteritidis	11	.	100	.	.	.	100	.	.	.	.	97.8	.	.	100	.	100	100	100	100	100	100	100	100	100	100	100	100	100	100	100	100	100	100	100	100	99.12	88.14	100	100	100	100	100	.	100	100	100	100
DAAFOT01	S. enteritidis	11	.	.	.	.	.	.	.	.	.	.	.	.	.	100	.	.	.	100	100	100	100	100	100	100	100	100	100	100	100	100	100	100	100	100	100	.	88.14	100	100	100	100	100	.	100	100	100	100
DAAFPB01	S. enteritidis	11	.	.	.	.	.	.	.	.	.	.	.	.	.	100	.	.	.	100	100	100	100	100	100	100	100	100	100	100	100	100	100	100	100	100	100	.	88.14	100	100	100	100	100	.	100	100	100	100
DAAFPC01	S. enteritidis	11	.	100	.	.	.	.	.	.	.	.	.	.	.	100	99.88	.	100	100	100	100	100	100	100	100	100	100	100	100	100	100	100	100	100	100	100	.	88.14	100	100	100	100	100	.	100	100	100	100
DAAFPD01	S. enteritidis	11	.	.	.	.	.	.	.	.	.	.	.	.	.	100	.	.	.	100	100	100	100	100	100	100	100	100	100	100	100	100	100	100	100	100	100	.	88.14	100	100	100	100	100	.	100	100	100	100
DAAFPE01	S. enteritidis	11	.	.	.	.	.	.	.	.	.	.	.	.	.	100	.	.	.	100	100	100	100	100	100	100	100	100	100	100	100	100	100	100	100	100	100	.	88.14	100	100	100	100	100	.	100	100	100	100
DAAFPG01	S. enteritidis	1479	.	100	.	.	.	.	.	.	.	.	97.8	.	.	100	.	.	.	100	100	100	100	100	100	100	100	100	100	100	100	100	.	.	.	.	100	.	88.14	100	100	100	100	100	.	100	100	100	.
DAAFPJ01	S. enteritidis	11	.	100	.	.	.	.	.	.	.	.	97.8	.	.	100	99.88	.	100	100	100	100	100	100	100	100	100	100	100	100	100	100	100	100	100	100	100	.	88.14	100	100	100	100	100	.	100	100	100	.
DAAFQF01	S. enteritidis	11	.	.	.	.	.	.	.	.	.	.	.	.	.	100	.	.	.	100	100	100	100	100	100	100	100	100	100	100	100	100	100	100	100	100	100	.	88.14	100	100	100	100	100	.	100	100	100	100
DAAFQG01	S. enteritidis	11	.	.	.	.	.	.	.	.	.	.	.	.	.	100	.	.	.	100	100	100	100	100	100	100	100	100	100	100	100	100	100	100	100	100	100	.	88.14	100	100	100	100	100	.	100	100	100	100
DAAFQH01	S. enteritidis	11	.	.	.	.	.	.	.	.	.	.	.	.	.	100	.	.	.	100	100	100	100	100	100	100	100	100	100	100	100	100	.	.	.	.	100	.	88.14	100	100	100	100	100	.	100	100	100	.
DAAFQI01	S. enteritidis	11	.	100	.	.	.	.	.	.	.	.	.	.	.	100	.	.	.	100	100	100	100	100	100	100	100	100	100	100	100	100	100	100	100	100	100	.	88.14	100	100	100	100	100	.	100	100	100	100
DAAFQJ01	S. enteritidis	11	.	.	.	.	.	.	.	.	.	.	.	.	.	100	.	.	.	100	100	100	100	100	100	100	100	100	100	100	100	100	100	100	100	100	100	.	88.14	100	100	100	100	100	.	100	100	100	100
DAAFQK01	S. enteritidis	11	.	.	.	.	.	.	.	.	.	.	.	.	.	100	.	.	.	100	100	100	100	100	100	100	100	100	100	100	100	100	100	100	100	100	100	.	88.14	100	100	100	100	100	.	100	100	100	100
DAAFQL01	S. enteritidis	814	.	.	.	.	.	.	.	.	.	.	.	.	.	100	.	.	.	100	100	100	100	100	100	100	100	100	100	100	100	100	100	100	100	100	100	.	88.14	100	100	100	100	100	.	100	100	100	100
DAAFQM01	S. enteritidis	11	.	.	.	.	.	.	.	.	.	.	.	.	.	100	.	.	.	100	100	100	100	100	100	100	100	100	100	100	100	100	100	100	100	100	100	.	88.14	100	100	100	100	100	.	100	100	100	100
DAAFQN01	S. enteritidis	11	.	.	.	.	.	.	.	.	.	.	.	.	.	100	.	.	.	100	100	100	100	100	100	100	100	100	100	100	100	100	100	100	100	100	100	.	88.14	100	100	100	100	100	.	100	100	100	100
DAAFQO01	S. enteritidis	11	.	.	.	.	.	.	.	.	.	.	.	.	.	100	.	.	.	100	100	100	100	100	100	100	100	100	100	100	100	100	100	100	100	100	100	.	88.14	100	100	100	100	100	.	100	100	100	100
DAAFQP01	S. enteritidis	11	.	.	.	.	.	.	.	.	.	.	.	.	.	100	.	.	.	100	100	100	100	100	100	100	100	100	100	100	100	100	100	100	100	100	100	.	88.14	100	100	100	100	100	.	100	100	100	100
DAAFQQ01	S. enteritidis	11	.	.	.	.	.	.	.	.	.	.	.	.	.	100	.	.	.	100	100	100	100	100	100	100	100	100	100	100	100	100	100	100	100	100	100	.	88.14	100	100	100	100	100	.	100	100	100	100
DAAFQR01	S. enteritidis	11	.	.	.	.	.	.	.	.	.	.	.	.	.	100	.	.	.	100	100	100	100	100	100	100	100	100	100	100	100	100	100	100	100	100	100	.	88.14	100	100	100	100	100	.	100	100	100	100
DAAFQS01	S. enteritidis	11	.	.	.	.	.	.	.	.	.	.	.	.	.	100	.	.	.	100	100	100	100	100	100	100	100	100	100	100	100	100	100	100	100	100	100	.	88.14	100	100	100	100	100	.	100	100	100	100
DAAFQT01	S. enteritidis	11	.	.	.	.	.	.	.	.	.	.	.	.	.	100	.	.	.	100	100	100	100	100	100	100	100	100	100	100	100	100	100	100	100	100	100	.	88.14	100	100	100	100	100	.	100	100	100	100
DAAFQU01	S. enteritidis	11	.	.	.	.	.	.	.	.	.	.	.	.	.	100	.	.	.	100	100	100	100	100	100	100	100	100	100	100	100	100	100	100	100	100	100	.	88.14	100	100	100	100	100	.	100	100	100	100
DAAFQV01	S. enteritidis	11	.	.	.	.	.	100	.	.	.	.	.	.	.	100	.	.	100	100	100	100	100	100	100	100	100	100	100	100	100	100	100	100	100	100	100	.	88.14	100	100	100	100	100	.	100	100	100	100
DAAFQW01	S. enteritidis	-	.	.	.	.	.	.	.	.	.	.	.	.	.	100	.	.	.	100	100	100	100	100	100	100	100	100	100	100	100	100	100	100	100	100	100	.	88.14	100	100	100	100	100	.	100	100	100	100
DAAFQX01	S. enteritidis	11	.	.	.	.	.	.	.	.	.	.	.	.	.	100	.	.	.	100	100	100	100	100	100	100	100	100	100	100	100	100	100	100	100	100	100	.	88.14	100	100	100	100	100	.	100	100	100	100
DAAFQY01	S. enteritidis	11	.	.	.	.	.	.	.	.	.	.	.	.	.	100	.	.	.	100	100	100	100	100	100	100	100	100	100	100	100	100	100	100	100	100	100	.	88.14	100	100	100	100	100	.	100	100	100	100
DAAFQZ01	S. enteritidis	11	.	.	.	.	.	.	.	.	.	.	.	.	.	100	.	.	.	100	100	100	100	100	100	100	100	100	100	100	100	100	100	100	100	100	100	.	88.14	100	100	100	100	100	.	100	100	100	100
DAAFRA01	S. enteritidis	11	.	.	.	.	.	.	.	.	.	.	.	.	.	100	.	.	.	100	100	100	100	100	100	100	100	100	100	100	100	100	100	100	100	100	100	.	88.14	100	100	100	100	100	.	100	100	100	100
DAAFRB01	S. enteritidis	11	.	.	.	.	.	.	.	.	.	.	.	.	.	100	.	.	.	100	100	100	100	100	100	100	100	100	100	100	100	100	100	100	100	100	100	.	88.14	100	100	100	100	100	.	100	100	100	100
DAAFRC01	S. enteritidis	11	.	.	.	.	.	.	.	.	.	.	.	.	.	100	.	.	.	100	100	100	100	100	100	100	100	100	100	100	100	100	100	100	100	100	100	.	88.14	100	100	100	100	100	.	100	100	100	100
DAAFRD01	S. enteritidis	11	.	.	.	.	.	.	.	.	.	.	.	.	.	100	.	.	.	100	100	100	100	100	100	100	100	100	100	100	100	100	100	100	100	100	100	.	88.14	100	100	100	100	100	.	100	100	100	100
DAAFRE01	S. enteritidis	11	.	.	.	.	.	.	.	.	.	.	.	.	.	100	.	.	.	100	100	100	100	100	100	100	100	100	100	100	100	100	100	100	100	100	100	.	88.14	100	100	100	100	100	.	100	100	100	100
DAAFRF01	S. enteritidis	11	.	.	.	.	.	.	.	.	.	.	.	.	.	100	.	.	.	100	100	100	100	100	100	100	100	100	100	100	100	100	100	100	100	100	100	.	88.14	100	100	100	100	100	.	100	100	100	100
DAAFRG01	S. enteritidis	11	.	.	.	.	.	.	.	.	.	.	.	.	.	100	.	.	.	100	100	100	100	100	100	100	100	100	100	100	100	100	100	100	100	100	100	.	88.14	100	100	100	100	100	.	100	100	100	100
DAAFRH01	S. enteritidis	11	.	.	.	.	.	.	.	.	.	.	.	.	.	100	.	.	.	100	100	100	100	100	100	100	100	100	100	100	100	100	100	100	100	100	100	.	88.14	100	100	100	100	100	.	100	100	100	100
DAAFRI01	S. enteritidis	11	.	.	.	.	.	.	.	.	.	.	.	.	.	100	.	.	.	100	100	100	100	100	100	100	100	100	100	100	100	100	100	100	100	100	100	.	88.14	100	100	100	100	100	.	100	100	100	100
DAAFRJ01	S. enteritidis	11	.	.	.	.	.	.	.	.	.	.	.	.	.	100	.	.	.	100	100	100	100	100	100	100	100	100	100	100	100	100	100	100	100	100	100	.	88.14	100	100	100	100	100	.	100	100	100	100
DAAFRK01	S. enteritidis	11	.	.	.	.	.	.	.	.	.	.	.	.	.	100	.	.	.	100	100	100	100	100	100	100	100	100	100	100	100	100	100	100	100	100	100	.	88.14	100	100	100	100	100	.	100	100	100	100
DAAFRL01	S. enteritidis	11	.	.	.	.	.	.	.	.	.	.	.	.	.	100	.	.	.	100	100	100	100	100	100	100	100	100	100	100	100	100	100	100	.	100	100	.	100	100	100	100	100	100	.	100	100	100	100
DAAFRM01	S. enteritidis	11	.	.	.	.	.	.	.	.	.	.	.	.	.	100	.	.	.	100	100	100	100	100	100	100	100	100	100	100	100	100	100	100	100	100	100	.	88.14	100	100	100	100	100	.	100	100	100	100
DAAFRN01	S. enteritidis	11	.	.	.	.	.	.	.	.	.	.	.	.	.	100	.	.	.	100	100	100	100	100	100	100	100	100	100	100	100	100	100	100	100	100	100	.	88.14	100	100	100	100	100	.	100	100	100	100
DAAFRO01	S. enteritidis	11	.	.	.	.	.	.	.	.	.	.	.	.	.	100	.	.	.	100	100	100	100	100	100	100	100	100	100	100	100	100	99.04	100	100	100	100	.	88.14	100	100	100	100	100	.	100	100	100	100
DAAFRP01	S. enteritidis	11	.	.	.	.	.	.	.	.	.	.	.	.	.	100	.	.	.	100	100	100	100	100	100	100	100	100	100	100	100	100	100	100	100	100	100	.	88.14	100	100	100	100	100	.	100	100	100	100
DAAFRQ01	S. enteritidis	11	.	.	.	.	.	.	.	.	.	.	.	.	.	100	.	.	.	100	100	100	100	100	100	100	100	100	100	100	100	100	100	100	100	100	100	.	88.14	100	100	100	100	100	.	100	100	100	100
DAAFRR01	S. enteritidis	11	100	100	.	.	100	.	.	.	.	.	.	.	100	100	.	.	.	100	100	100	100	100	100	100	100	100	100	100	100	100	.	.	.	.	100	.	88.14	100	100	100	100	100	.	100	100	100	.
DAAFRS01	S. enteritidis	11	.	100	.	.	100	.	.	.	100	.	.	100	.	100	.	100	100	100	100	100	100	100	100	100	100	100	100	100	100	100	.	.	.	.	100	.	88.14	100	.	100	100	100	.	100	100	100	.
DAAFRT01	S. enteritidis	11	.	100	.	.	100	.	.	.	.	.	.	.	.	100	.	.	.	100	100	100	100	100	100	100	100	100	100	100	100	100	.	.	.	.	100	.	88.14	100	100	100	100	100	.	100	100	100	.
DAAFRU01	S. enteritidis	11	.	100	.	.	100	.	.	.	100	.	.	100	.	100	.	100	100	100	100	100	100	100	100	100	100	100	100	100	100	100	.	.	.	.	100	.	88.14	100	.	100	100	100	.	100	100	100	.
DAAFRV01	S. enteritidis	11	.	100	.	.	100	.	.	.	100	.	.	100	.	100	.	100	100	100	100	100	100	100	100	100	100	100	100	100	100	100	.	.	.	.	100	.	88.14	100	.	100	100	100	.	100	100	100	.
DAAFRW01	S. enteritidis	11	.	100	.	.	.	.	.	.	.	.	.	.	.	100	.	.	.	100	100	100	100	100	100	100	100	100	100	100	100	100	.	.	.	.	100	.	88.14	100	100	100	100	100	.	100	100	100	.
DAAFRX01	S. enteritidis	11	.	100	.	.	.	.	.	.	.	.	.	.	.	100	.	.	.	100	100	100	100	100	100	100	100	100	100	100	100	100	.	.	.	.	100	.	88.14	100	100	100	100	100	.	100	100	100	.
DAAFRY01	S. enteritidis	11	.	100	.	.	100	.	.	.	100	.	.	100	.	100	.	100	100	100	100	100	100	100	100	100	100	100	100	100	100	100	.	.	.	.	100	.	88.14	100	.	100	100	100	.	100	100	100	.
DAAFRZ01	S. enteritidis	11	.	100	.	.	.	.	.	.	.	.	.	.	.	100	.	.	.	100	100	100	100	100	100	100	100	100	100	100	100	100	100	100	100	100	100	.	88.14	100	100	100	100	100	.	100	100	100	100
DAAFSA01	S. enteritidis	11	.	100	.	.	100	.	.	.	.	.	97.8	.	.	100	.	.	.	100	100	100	100	100	100	100	100	100	100	100	100	100	.	.	.	.	100	.	88.14	100	100	100	100	100	.	100	100	100	.
DAAFSB01	S. enteritidis	11	.	100	.	.	100	.	.	.	100	.	.	100	.	100	.	100	100	100	100	100	100	100	100	100	100	100	100	100	100	100	.	.	.	.	100	.	88.14	100	.	100	100	100	.	100	100	100	.
DAAFSC01	S. enteritidis	11	.	100	.	.	100	.	.	.	100	.	.	100	.	100	.	100	100	100	100	100	100	100	100	100	100	100	100	100	100	100	.	.	.	.	100	.	88.14	100	.	100	100	100	.	100	100	100	.
DAAFSD01	S. enteritidis	11	.	100	.	.	.	.	.	.	100	.	.	100	.	100	.	100	100	100	100	100	100	100	100	100	100	100	100	100	100	100	.	.	.	.	100	.	88.14	100	.	100	100	100	.	100	100	100	.
DAAFSE01	S. enteritidis	11	.	.	.	.	.	.	.	.	.	.	.	.	.	100	.	.	.	100	100	100	100	100	100	100	100	100	100	100	100	100	100	100	100	100	100	.	88.14	100	100	100	100	100	.	100	100	100	100
DAAFSF01	S. enteritidis	11	.	100	.	.	.	.	.	.	.	.	.	.	.	100	.	.	.	100	100	100	100	100	100	100	100	100	100	100	100	100	.	.	.	.	100	.	88.14	100	100	100	100	100	.	100	100	100	.
DAAFSG01	S. enteritidis	11	.	.	.	.	.	.	.	.	.	.	.	.	.	100	.	.	.	100	100	100	100	100	100	100	100	100	100	100	100	100	.	.	.	.	100	.	88.14	100	100	100	100	100	.	100	100	100	.
DAAFSH01	S. enteritidis	366	.	.	100	.	100	.	.	.	.	.	97.8	.	.	100	.	.	.	100	100	100	100	100	100	100	100	100	100	100	100	100	100	100	100	100	100	.	88.14	100	100	100	100	100	.	100	100	100	100
DAAFSI01	S. enteritidis	11	100	100	.	.	100	.	.	.	.	.	.	.	100	100	.	.	.	100	100	100	100	100	100	100	100	100	100	100	100	100	.	.	.	.	100	.	88.14	100	100	100	100	100	.	100	100	100	.
DAAFSJ01	S. enteritidis	11	100	100	.	.	100	.	.	.	.	.	.	.	100	100	.	.	.	100	100	100	100	100	100	100	100	100	100	100	100	100	.	.	.	.	100	.	88.14	100	100	100	100	100	.	100	100	100	.
DAAFSK01	S. enteritidis	11	.	.	.	.	.	.	.	.	.	.	.	.	.	100	.	.	.	100	100	100	100	100	100	100	100	100	100	100	100	100	100	100	100	100	100	.	88.14	100	100	100	100	100	.	100	100	100	100
DAAFSL01	S. enteritidis	11	.	.	.	.	.	.	.	.	.	.	.	.	.	100	.	.	.	100	100	100	100	100	100	100	100	100	100	100	100	100	100	100	100	100	100	.	88.14	100	100	100	100	100	.	100	100	100	100
DAAFSM01	S. enteritidis	11	.	.	.	.	.	.	.	.	.	.	.	.	.	100	.	.	.	100	100	100	100	100	100	100	100	100	100	100	100	100	100	100	100	100	100	.	88.14	100	100	100	100	100	.	100	100	100	100
DAAFSN01	S. enteritidis	11	.	.	.	.	.	.	.	.	.	.	.	.	.	100	.	.	.	100	100	100	100	100	100	100	100	100	100	100	100	99.48	.	.	.	.	100	.	100	100	100	100	100	100	100	100	100	100	.
DAAFSO01	S. enteritidis	11	.	.	.	.	.	.	.	.	.	.	.	.	.	100	.	.	.	100	100	100	100	100	100	100	100	100	100	100	100	100	.	.	.	.	100	.	88.14	100	100	100	100	100	.	100	100	100	.
DAAFSP01	S. enteritidis	11	.	.	.	.	.	.	.	.	.	.	.	.	.	100	.	.	.	100	100	100	100	100	100	100	100	100	100	100	97.35	100	100	100	100	100	100	.	88.14	100	100	100	100	100	.	100	100	100	.
DAAFSQ01	S. enteritidis	1977	.	.	.	.	.	.	.	.	.	.	.	.	.	100	.	.	.	100	100	100	100	100	100	100	100	100	100	100	100	100	100	100	100	100	100	.	88.14	100	100	100	100	100	.	100	100	100	100
DAAFSR01	S. enteritidis	11	.	.	.	.	.	.	.	.	.	.	.	.	.	100	.	.	.	100	100	100	100	100	100	100	100	100	100	100	100	100	100	100	100	100	100	.	88.14	100	100	100	100	100	.	100	100	100	100
DAAFSS01	S. enteritidis	11	.	.	.	.	.	.	.	.	.	.	.	.	.	100	.	.	.	100	100	100	100	100	100	100	100	100	100	100	100	100	100	100	100	100	100	.	88.14	100	100	100	100	100	.	100	100	100	100
DAAFST01	S. enteritidis	11	.	.	.	.	.	.	.	.	.	.	.	.	.	100	.	.	.	100	100	100	100	100	100	100	100	100	100	100	100	100	100	100	100	100	100	.	88.14	100	100	100	100	100	.	100	100	100	100
DAAFSU01	S. enteritidis	11	.	.	.	.	.	.	.	.	.	.	.	.	.	100	.	.	.	100	100	100	100	100	100	100	100	100	100	100	100	100	100	100	100	100	100	.	88.14	100	100	100	100	100	.	100	100	100	100
DAAFSV01	S. enteritidis	11	.	.	.	.	.	.	.	.	.	.	.	.	.	100	.	.	.	100	100	100	100	100	100	100	100	100	100	100	100	100	.	.	.	.	100	.	88.14	100	100	100	100	100	.	100	100	100	.
DAAFSW01	S. enteritidis	11	.	.	.	.	.	.	.	.	.	.	.	.	.	100	.	.	.	100	100	100	100	100	100	100	100	100	100	100	100	100	100	100	100	100	100	.	88.14	100	100	100	100	100	.	100	100	100	100
DAAFSX01	S. enteritidis	11	.	.	.	.	.	.	.	.	.	.	.	.	.	100	.	.	.	100	100	100	100	100	100	100	100	100	99.96	100	100	100	100	100	.	100	100	.	100	100	100	100	100	100	.	100	100	100	100
DAAFSY01	S. enteritidis	11	.	100	.	.	.	.	.	.	.	.	97.8	.	.	100	.	100	100	100	100	100	100	100	100	100	100	100	100	100	100	100	100	100	100	100	100	.	88.14	100	100	100	100	100	.	100	100	100	100
DAAFSZ01	S. enteritidis	11	.	100	.	.	.	.	.	.	.	.	97.8	.	.	100	99.88	.	100	100	100	100	100	100	100	100	100	100	100	100	100	100	100	100	100	100	100	.	88.14	100	100	100	100	100	.	100	100	100	.
DAAFTA01	S. enteritidis	745	.	.	.	.	.	.	.	.	.	.	.	.	.	100	.	.	.	100	100	100	100	100	100	100	100	100	100	100	100	100	100	100	100	100	100	.	88.14	100	100	100	100	100	.	100	100	100	100
DAAFTB01	S. enteritidis	11	.	.	.	.	.	.	.	.	.	.	.	.	.	100	.	.	.	100	100	100	100	100	100	100	100	100	100	100	100	100	100	100	100	100	100	.	88.14	100	100	100	100	100	.	100	100	100	100
DAAFTC01	S. enteritidis	11	.	100	.	.	100	.	.	.	100	.	97.8	.	.	100	99.88	.	100	100	100	100	100	100	100	100	100	100	100	100	100	100	100	100	100	100	100	.	88.14	100	100	100	100	100	.	100	100	100	100
DAAFTD01	S. enteritidis	11	.	100	.	.	100	.	.	.	100	.	.	100	.	100	.	100	100	100	100	100	100	100	100	100	100	100	100	100	100	100	.	.	.	.	100	.	88.14	100	.	100	100	100	.	100	100	100	.
DAAFTE01	S. enteritidis	11	.	.	.	.	.	.	.	.	.	.	.	.	.	100	.	.	.	100	100	100	100	100	100	100	100	100	100	100	100	100	100	100	100	100	100	.	88.14	100	100	100	100	100	.	100	100	100	100
DAAFTF01	S. enteritidis	11	.	.	.	.	.	.	.	.	.	.	.	.	.	100	.	.	.	100	100	100	100	100	100	100	100	100	100	100	100	100	100	100	100	100	100	.	88.14	100	100	100	100	100	.	100	100	100	100
DAAFTG01	S. enteritidis	183	.	.	.	.	.	.	.	.	.	.	.	.	.	100	.	.	.	100	100	100	100	100	100	100	100	100	100	100	100	100	100	100	100	100	100	.	88.14	100	100	100	100	100	.	100	100	100	100
DAAFTH01	S. enteritidis	11	.	.	.	.	.	.	.	.	.	.	.	.	.	100	.	.	.	100	100	100	100	100	100	100	100	99.71	100	100	100	99.48	.	.	.	.	100	.	100	100	100	100	100	100	100	100	100	100	.
DAAFTI01	S. enteritidis	136	.	100	.	.	.	.	.	.	.	.	.	.	.	100	.	.	.	100	100	100	100	100	100	100	100	100	100	100	100	100	100	100	100	100	100	.	88.14	100	100	100	100	100	.	100	100	100	100
DAAFTJ01	S. enteritidis	11	.	.	.	.	.	.	.	.	.	.	.	.	.	100	.	.	.	100	100	100	100	100	100	100	100	100	100	100	100	100	100	100	100	100	100	.	88.14	100	100	100	100	100	.	100	100	100	100
DAAFTK01	S. enteritidis	11	.	.	.	.	.	.	.	.	.	.	.	.	.	100	.	.	.	100	100	100	100	100	100	100	100	100	100	100	100	100	.	.	.	.	100	.	88.14	100	100	100	100	100	.	100	100	100	.
DAAFTL01	S. enteritidis	11	.	.	.	.	.	.	.	.	.	.	.	.	.	100	.	.	.	100	100	100	100	100	100	100	100	100	100	100	100	100	100	100	100	100	100	.	88.14	100	100	100	100	100	.	100	100	100	100
DAAFTM01	S. enteritidis	11	.	.	.	.	.	.	.	.	.	.	.	.	.	100	.	.	.	100	100	100	100	100	100	100	100	100	100	100	100	100	100	100	100	100	100	.	88.14	100	100	100	100	100	.	100	100	100	100
DAAFTN01	S. enteritidis	11	.	100	.	.	.	100	.	.	.	.	.	.	.	100	.	100	100	100	100	100	100	100	100	100	100	100	100	100	100	100	100	100	100	100	100	.	88.14	100	100	100	100	100	.	100	100	100	100
DAAFTO01	S. enteritidis	11	.	.	.	.	.	.	.	.	.	.	.	.	.	100	.	.	.	100	100	100	100	100	100	100	100	100	100	100	100	100	100	100	100	100	100	.	88.14	100	100	100	100	100	.	100	100	100	100
DAAFTQ01	S. enteritidis	11	.	.	.	.	.	.	.	.	.	.	.	.	.	100	.	.	.	100	100	100	100	100	100	100	100	100	100	100	100	100	100	100	100	100	100	.	88.14	100	100	100	100	100	.	100	100	100	100
DAAFTU01	S. enteritidis	1983	.	.	.	.	.	.	.	.	.	.	97.8	.	.	100	.	.	.	100	100	100	100	100	100	100	100	100	100	100	100	100	100	100	100	100	100	.	88.14	100	100	100	100	100	.	100	100	100	100
DAAGCE01	S. enteritidis	11	.	.	.	.	.	.	.	.	.	.	.	.	.	100	.	.	.	100	100	100	100	100	100	100	100	100	100	100	100	100	100	100	.	.	100	.	88.14	100	100	100	100	100	.	100	100	100	.
DAAGCF01	S. enteritidis	11	.	.	.	.	.	.	.	.	.	.	.	.	.	100	.	.	.	100	100	100	100	100	100	100	100	100	100	100	97.35	100	100	100	100	100	100	.	88.14	100	100	100	100	100	.	100	100	100	100
DAAGCG01	S. enteritidis	11	.	.	.	.	.	.	.	.	.	.	.	.	.	100	.	.	.	100	100	100	100	100	100	100	100	100	100	100	100	100	100	100	100	100	100	.	88.14	100	100	100	100	100	.	100	100	100	100
DAAGCH01	S. enteritidis	11	.	100	.	.	.	.	.	.	.	.	.	.	.	100	.	.	.	100	100	100	100	100	100	100	100	100	100	100	100	100	100	100	100	100	100	.	88.14	100	100	100	100	100	.	100	100	100	100
DAAGCI01	S. enteritidis	11	.	.	.	.	.	.	.	.	.	.	.	.	.	100	.	.	.	100	100	100	100	100	100	100	100	100	100	100	100	100	100	100	100	100	100	.	88.14	100	100	100	100	100	.	100	100	100	100
DAAGCJ01	S. enteritidis	11	.	.	.	.	.	.	.	.	.	.	.	.	.	100	.	.	.	100	100	100	100	100	100	100	100	100	100	100	100	100	100	100	100	100	100	.	88.14	100	100	100	100	100	.	100	100	100	100
DAAGCK01	S. enteritidis	11	.	.	.	.	.	.	.	.	.	.	.	.	.	100	.	.	.	100	100	100	100	100	100	100	100	100	100	100	100	100	100	100	100	100	100	.	88.14	100	100	100	100	100	.	100	100	100	100
DAAGCL01	S. enteritidis	11	.	.	.	.	.	.	.	.	.	.	.	.	.	100	.	.	.	100	100	100	100	100	100	100	100	100	100	100	100	100	100	100	100	100	100	.	88.14	100	100	100	100	100	.	100	100	100	100
DAAGCM01	S. enteritidis	11	.	.	.	.	.	.	.	.	.	.	.	.	.	100	.	.	.	100	100	100	100	100	100	100	100	100	99.96	100	100	100	100	100	100	100	100	.	88.14	100	100	100	100	100	.	100	100	100	100
DAAGCN01	S. enteritidis	2107	.	100	.	.	.	100	.	.	.	.	97.8	.	.	100	.	97.01	100	100	100	100	100	100	100	100	100	100	100	100	100	100	100	100	100	100	100	.	88.14	100	100	100	100	100	.	100	100	100	100
DAAGCO01	S. enteritidis	11	.	.	.	.	.	.	.	.	.	.	.	.	.	100	.	.	.	100	100	100	100	100	100	100	100	100	100	100	100	100	100	100	100	100	100	.	88.14	100	100	100	100	100	.	100	100	100	100
DAAGCP01	S. enteritidis	11	.	100	.	.	.	100	.	.	.	.	97.8	.	.	100	.	97.01	100	100	100	100	100	100	100	100	100	100	100	100	100	100	100	100	100	100	100	.	88.14	100	100	100	100	100	.	100	100	100	100
DAAGCQ01	S. enteritidis	11	.	.	.	.	.	.	.	.	.	.	97.8	.	.	100	.	100	100	100	100	100	100	100	100	100	100	100	100	100	100	100	.	.	.	.	100	.	88.14	100	100	100	100	100	.	100	100	100	100
DAAGCR01	S. enteritidis	11	.	100	.	.	.	100	.	.	.	.	97.8	.	.	100	.	100	100	100	100	100	100	100	100	100	100	100	100	100	100	100	100	100	100	100	100	.	88.14	100	100	100	100	100	.	100	100	100	100
DAAGCS01	S. enteritidis	11	.	.	.	.	.	.	.	.	.	.	97.8	.	.	100	.	100	100	100	100	100	100	100	100	100	100	100	100	100	100	100	100	100	100	85.14	100	.	88.14	100	100	100	100	100	.	100	100	100	100
DAAGCT01	S. enteritidis	11	.	100	.	.	.	100	.	.	.	.	97.8	.	.	100	.	97.01	100	100	100	100	100	100	100	100	100	100	100	100	100	100	100	100	100	100	100	.	88.14	100	100	100	100	100	.	100	100	100	100
DAAGCU01	S. enteritidis	11	.	.	.	.	.	.	.	.	.	.	.	.	.	100	.	.	.	100	100	100	100	100	100	100	100	100	100	100	100	100	100	100	100	100	100	.	88.14	100	100	100	100	100	.	100	100	100	100
DAAGCV01	S. enteritidis	11	.	.	.	.	.	.	.	.	.	.	.	.	.	100	.	.	.	100	100	100	100	100	100	100	100	100	100	100	100	100	100	100	100	100	100	.	88.14	100	100	100	100	100	.	100	100	100	100
DAAGCW01	S. enteritidis	11	.	.	.	.	.	.	.	.	.	.	.	.	.	100	.	.	.	100	100	100	100	100	100	100	100	100	100	100	100	100	100	100	100	100	100	.	88.14	100	100	100	100	100	.	100	100	100	100
DAAGCX01	S. enteritidis	11	.	.	.	.	.	.	.	.	.	.	.	.	.	100	.	.	.	100	100	100	100	100	100	100	100	100	100	100	100	100	.	.	.	.	100	.	88.14	100	100	100	100	100	.	100	100	100	.
DAAGCY01	S. enteritidis	136	.	.	.	.	.	.	.	.	.	.	.	.	.	100	.	.	.	100	100	100	100	100	100	100	100	100	100	100	100	100	100	100	100	100	100	.	88.14	100	100	100	100	100	.	100	100	100	100
DAAGCZ01	S. enteritidis	11	.	.	.	.	.	.	.	.	.	.	.	.	.	100	.	.	.	100	100	100	100	100	100	100	100	100	100	100	100	100	100	100	100	100	100	.	88.14	100	100	100	100	100	.	100	100	100	.
DAAGDA01	S. enteritidis	11	.	.	.	.	.	.	.	.	.	.	.	.	.	100	.	.	.	100	100	100	100	100	100	100	100	100	100	100	100	100	.	.	.	.	100	.	88.14	100	100	100	100	100	.	100	100	100	.
DAAGDB01	S. enteritidis	11	.	.	.	.	.	.	.	.	.	.	.	.	.	100	.	.	.	100	100	100	100	100	100	100	100	100	100	100	100	98.12	100	100	100	100	100	.	88.14	100	100	100	100	100	.	100	100	100	100
DAAGDC01	S. enteritidis	11	.	.	.	.	.	.	.	.	.	.	97.8	.	.	100	.	100	100	100	100	100	100	100	100	100	100	100	100	100	100	100	.	.	.	.	100	.	88.14	100	100	100	100	100	.	100	100	100	100
DAAGDD01	S. enteritidis	11	.	100	.	.	.	.	.	.	.	.	97.8	.	.	100	99.88	.	100	100	100	100	100	100	100	100	100	100	100	100	100	100	100	100	100	100	100	.	88.14	100	100	100	100	100	.	100	100	100	.
DAAGDE01	S. enteritidis	11	.	100	.	.	.	100	.	.	.	.	97.8	.	.	100	.	97.01	100	100	100	100	100	100	100	100	100	100	100	100	100	100	100	100	100	100	100	.	88.14	100	100	100	100	100	.	100	100	100	100
DAAGDF01	S. enteritidis	11	.	.	.	.	.	.	.	.	.	.	.	.	.	100	.	.	.	100	100	100	100	100	100	100	100	100	100	100	100	100	100	100	100	100	100	.	88.14	100	100	100	100	100	.	100	100	100	100
DAAGDG01	S. enteritidis	11	.	.	.	.	.	.	.	.	.	.	.	.	.	100	.	.	.	100	100	100	100	100	100	100	100	100	100	100	100	100	100	100	100	100	100	.	88.14	100	100	100	100	100	.	100	100	100	100
DAAGDH01	S. enteritidis	11	.	100	.	.	.	100	.	.	.	.	97.8	.	.	100	99.88	97.01	100	100	100	100	100	100	100	100	100	100	100	100	100	100	100	100	100	100	100	.	88.14	100	100	100	100	100	.	100	100	100	.
DAAGDI01	S. enteritidis	11	.	100	.	.	.	100	.	.	.	.	97.8	.	.	100	.	100	100	100	100	100	100	100	100	100	100	100	100	100	100	100	.	.	.	.	100	.	88.14	100	100	100	100	100	.	100	100	100	100
DAAGDJ01	S. enteritidis	11	.	.	.	.	.	.	.	.	.	.	.	.	.	100	.	.	.	100	100	100	100	100	100	100	100	100	100	100	100	100	100	100	100	100	100	.	88.14	100	100	100	100	100	.	100	100	100	100
DAAGDK01	S. enteritidis	11	.	.	.	.	.	.	.	.	.	.	97.8	.	.	100	.	.	.	100	100	100	100	100	100	100	100	100	100	100	100	100	100	100	100	100	100	.	88.14	100	100	100	100	100	.	100	100	100	100
DAAGDL01	S. enteritidis	11	.	.	.	.	.	.	.	.	.	.	.	.	.	100	.	.	.	100	100	100	100	100	100	100	100	100	100	100	100	100	100	100	100	100	100	.	88.14	100	100	100	100	100	.	100	100	100	100
DAAGDM01	S. enteritidis	11	.	.	.	.	.	.	.	.	.	.	.	.	.	100	.	.	.	100	100	100	100	100	100	100	100	100	100	100	100	100	100	100	100	100	100	.	88.14	100	100	100	100	100	.	100	100	100	100
DAAGDN01	S. enteritidis	11	.	.	.	.	.	.	.	.	.	.	.	.	.	100	.	.	.	100	100	100	100	100	100	100	100	100	99.96	100	100	100	100	100	100	100	100	.	88.14	100	100	100	100	100	.	100	100	100	100
DAAGDO01	S. enteritidis	11	.	100	.	.	100	.	.	.	100	.	.	100	.	100	.	100	100	100	100	100	100	100	100	94	100	100	100	100	100	100	.	.	.	.	99.38	.	88.14	100	.	100	100	100	.	100	100	100	.
DAAGDP01	S. enteritidis	1974	.	.	.	.	.	.	.	.	.	.	.	.	.	100	.	.	.	100	100	100	100	100	100	100	100	100	100	100	100	100	100	100	100	100	100	.	88.14	100	100	100	100	100	.	100	100	100	100
DAAGDQ01	S. enteritidis	11	.	.	.	.	.	.	.	.	.	.	.	.	.	100	.	.	.	100	100	100	100	100	100	100	100	100	100	100	100	100	.	.	.	.	100	.	88.14	100	100	100	100	100	.	100	100	100	.
DAAGDR01	S. enteritidis	11	.	.	.	.	.	.	.	.	.	.	.	.	.	100	.	.	.	100	100	100	100	100	100	100	100	100	100	100	100	100	100	100	100	100	100	.	88.14	100	100	100	100	100	.	100	100	100	100
DAAGDS01	S. enteritidis	11	.	.	.	.	.	.	.	.	.	.	.	.	.	100	.	.	.	100	100	100	100	100	100	100	100	100	100	100	100	98.12	100	100	100	100	100	.	88.14	100	100	100	100	100	.	100	100	100	100
DAAGDT01	S. enteritidis	11	.	.	.	.	.	.	.	.	.	.	.	.	.	100	.	.	.	100	100	100	100	100	100	100	100	100	100	100	100	100	100	100	100	100	100	.	88.14	100	100	100	100	100	.	100	100	100	100
DAAGDU01	S. enteritidis	11	.	.	.	.	.	.	.	.	.	.	.	.	.	100	.	.	.	100	100	100	100	100	100	100	100	100	100	100	100	100	100	100	100	100	100	.	88.14	100	100	100	100	100	.	100	100	100	100
DAAGDV01	S. enteritidis	11	.	.	.	.	.	.	.	.	.	.	.	.	.	100	.	.	.	100	100	100	100	100	100	100	100	100	100	100	100	100	100	100	100	100	100	.	88.14	100	100	100	100	100	.	100	100	100	100
DAAGDW01	S. enteritidis	11	.	.	.	.	.	.	.	.	.	.	.	.	.	100	.	.	.	100	100	100	100	100	100	100	100	100	100	100	100	100	100	100	100	100	100	.	88.14	100	100	100	100	100	.	100	100	100	100
DAAGDX01	S. enteritidis	11	.	.	.	.	.	.	.	.	.	.	.	.	.	100	.	.	.	100	100	100	100	100	100	100	100	100	100	100	100	100	100	100	100	100	100	.	88.14	100	100	100	100	100	.	100	100	100	100
DAAGDY01	S. enteritidis	11	.	100	.	.	.	100	.	.	.	.	97.8	.	.	100	.	100	100	100	100	100	100	100	100	100	100	100	100	100	100	100	100	100	100	100	100	.	88.14	100	100	100	100	100	.	100	100	100	100
DAAGDZ01	S. enteritidis	11	.	100	.	.	.	100	.	.	.	.	97.8	.	.	100	.	97.01	100	100	100	100	100	100	100	100	100	100	100	100	100	100	100	100	100	100	100	.	88.14	100	100	100	100	100	.	100	100	100	100
DAAGEA01	S. enteritidis	11	.	100	.	.	100	.	.	.	100	.	97.8	.	.	100	99.88	.	100	100	100	100	100	100	100	100	100	100	100	100	100	100	100	100	100	100	100	.	88.14	100	100	100	100	100	.	100	100	100	100
DAAGEB01	S. enteritidis	11	.	.	.	.	.	.	.	.	.	.	.	.	.	100	.	.	.	100	100	100	100	100	100	100	100	100	100	100	100	100	100	100	100	100	100	.	88.14	100	100	100	100	100	.	100	100	100	100
DAAGEC01	S. enteritidis	11	.	.	.	.	.	.	.	.	.	.	.	.	.	100	.	.	.	100	100	100	100	100	100	100	100	100	100	100	100	100	.	.	.	.	100	.	88.14	100	100	100	100	100	.	100	100	100	.
DAAGED01	S. enteritidis	11	.	.	.	.	.	.	.	.	.	.	.	.	.	100	.	.	.	100	100	100	100	100	100	100	100	100	100	100	100	100	100	100	100	100	100	.	88.14	100	100	100	100	100	.	100	100	100	100
DAAGEE01	S. enteritidis	11	.	.	.	.	.	.	.	.	.	.	.	.	.	100	.	.	.	100	100	100	100	100	100	100	100	100	100	100	100	100	100	100	100	100	99.92	.	88.14	100	100	100	100	100	.	100	100	100	100
DAAGEF01	S. enteritidis	11	.	.	.	.	.	.	.	.	.	.	.	.	.	100	.	.	.	100	100	100	100	100	100	100	100	100	100	100	100	100	100	100	100	100	100	.	88.14	100	100	100	100	100	.	100	100	100	100
DAAGEG01	S. enteritidis	11	.	.	.	.	.	.	.	.	.	.	.	.	.	100	.	.	.	100	100	100	100	100	100	100	100	100	100	100	100	100	100	100	100	100	100	.	88.14	100	100	100	100	100	.	100	100	100	100
DAAGEH01	S. enteritidis	11	.	.	.	.	.	.	.	.	.	.	.	.	.	100	.	.	.	100	100	100	100	100	100	100	100	100	100	100	100	100	100	100	100	100	100	.	88.14	100	100	100	100	100	.	100	100	100	100
DAAGEI01	S. enteritidis	11	.	.	.	.	100	.	.	.	.	.	.	.	.	100	.	.	.	100	100	100	100	100	100	100	100	100	100	100	100	100	100	100	100	100	99.92	.	88.14	100	100	100	100	100	.	100	100	100	100
DAAGEJ01	S. enteritidis	11	.	.	.	.	.	.	.	.	.	.	.	.	.	100	.	.	.	100	100	100	100	100	100	100	100	100	100	100	100	100	100	100	100	100	100	.	88.14	100	100	100	100	100	.	100	100	100	100
DAAGEK01	S. enteritidis	11	.	.	.	.	.	.	.	.	.	.	.	.	.	100	.	.	.	100	100	100	100	100	100	100	100	100	100	100	100	100	100	100	100	100	100	.	88.14	100	100	100	100	100	.	100	100	100	100
DAAGEL01	S. enteritidis	2912	.	.	.	.	.	.	.	.	.	.	.	.	.	100	.	.	.	100	100	100	100	100	100	100	100	100	100	100	100	100	100	100	100	100	100	.	88.14	100	100	100	100	100	.	100	100	100	100
DAAGEM01	S. enteritidis	11	.	100	.	.	100	.	.	.	100	.	97.8	.	.	100	99.88	.	100	100	100	100	100	100	100	100	100	100	100	100	100	100	100	100	100	100	100	.	88.14	100	100	100	100	100	.	100	100	100	100
DAAGEN01	S. enteritidis	11	.	.	.	.	.	.	.	.	.	.	.	.	.	100	.	.	.	100	100	100	100	100	100	100	100	100	100	100	100	100	100	100	100	100	100	.	88.14	100	100	100	100	100	.	100	100	100	100
DAAGEO01	S. enteritidis	11	.	.	.	.	.	.	.	.	.	.	.	.	.	100	.	.	.	100	100	100	100	100	100	100	100	100	100	100	100	100	100	100	100	100	100	.	88.14	100	100	100	100	100	.	100	100	100	100
DAAGEP01	S. enteritidis	11	.	.	.	.	.	.	.	.	.	.	.	.	.	100	.	.	.	100	100	100	100	100	100	100	100	100	100	100	100	100	100	100	100	100	100	.	88.14	100	100	100	100	100	.	100	100	100	100
DAAGEQ01	S. enteritidis	11	.	.	.	.	.	.	.	.	.	.	.	.	.	100	.	.	.	100	100	100	100	100	100	100	100	100	100	100	100	100	100	100	100	100	100	.	88.14	100	100	100	100	100	.	100	100	100	100
DAAGER01	S. enteritidis	11	.	.	.	.	.	.	.	.	.	.	.	.	.	100	.	.	.	100	100	100	100	100	100	100	100	100	100	100	100	100	100	100	100	100	100	.	88.14	100	100	100	100	100	.	100	100	100	100
DAAGES01	S. enteritidis	11	.	.	.	.	.	.	.	.	.	.	.	.	.	100	.	.	.	100	100	100	100	100	100	100	100	100	100	100	100	100	100	100	100	100	100	.	88.14	100	100	100	100	100	.	100	100	100	100
DAAGET01	S. enteritidis	11	.	.	.	.	.	.	.	.	.	.	.	.	.	100	.	.	.	100	100	100	100	100	100	100	100	100	100	100	100	100	100	100	100	100	100	.	88.14	100	100	100	100	100	.	100	100	100	100
DAAGEU01	S. enteritidis	11	.	.	.	.	.	.	.	.	.	.	.	.	.	100	.	.	.	100	100	100	100	100	100	100	100	100	100	100	100	100	100	100	100	100	100	.	88.14	100	100	100	100	100	.	100	100	100	100
DAAGEV01	S. enteritidis	11	.	.	.	.	.	.	.	.	.	.	.	.	.	100	.	.	.	100	100	100	100	100	100	100	100	100	100	100	100	100	100	100	100	100	100	.	88.14	100	100	100	100	100	.	100	100	100	100
DAAGEW01	S. enteritidis	11	.	.	.	.	.	.	.	.	.	.	.	.	.	100	.	.	.	100	100	100	100	100	100	100	100	100	100	100	100	100	100	100	100	100	100	.	88.14	100	100	100	100	100	.	100	100	100	100
DAAGEX01	S. enteritidis	11	.	.	.	.	.	.	.	.	.	.	.	.	.	100	.	.	.	100	100	100	100	100	100	100	100	100	100	100	100	100	100	100	100	100	100	.	88.14	100	100	100	100	100	.	100	100	100	100
DAAGEY01	S. enteritidis	11	.	.	.	.	.	.	.	.	.	.	.	.	.	100	.	.	.	100	100	100	100	100	100	100	100	100	100	100	100	100	100	100	100	100	100	.	88.14	100	100	100	100	100	.	100	100	100	100
DAAGEZ01	S. enteritidis	11	.	.	.	.	.	.	.	.	.	.	.	.	.	100	.	.	.	100	100	100	100	100	100	100	100	100	100	100	100	100	100	100	100	100	100	.	88.14	100	100	100	100	100	.	100	100	100	100
DAAGFA01	S. enteritidis	11	.	.	.	.	.	.	.	.	.	.	.	.	.	100	.	.	.	100	100	100	100	100	100	100	100	100	100	100	100	100	100	100	100	100	100	.	88.14	100	100	100	100	100	.	100	100	100	100
DAAGFB01	S. enteritidis	11	.	.	.	.	.	.	.	.	.	.	.	.	.	100	.	.	.	100	100	100	100	100	100	100	100	100	100	100	100	100	99.04	100	100	100	100	.	88.14	100	100	100	100	100	.	100	100	100	100
DAAGFC01	S. enteritidis	11	.	.	.	.	.	.	.	.	.	.	.	.	.	100	.	.	.	100	100	100	100	100	100	100	100	100	100	100	100	100	100	100	100	100	100	.	88.14	100	100	100	100	100	.	100	100	100	100
DAAGFD01	S. enteritidis	11	.	.	.	.	.	.	.	.	.	.	.	.	.	100	.	.	.	100	100	100	100	100	100	100	100	100	100	100	100	100	100	100	100	100	100	.	88.14	100	100	100	100	100	.	100	100	100	100
DAAGFE01	S. enteritidis	11	.	.	.	.	.	.	.	.	.	.	.	.	.	100	.	.	.	100	100	100	100	100	100	100	100	100	100	100	100	100	100	100	100	100	100	.	88.14	100	100	100	100	100	.	100	100	100	100
DAAGFF01	S. enteritidis	1479	.	.	.	.	.	.	.	.	.	.	.	.	.	100	.	.	.	100	100	100	100	100	100	100	100	100	100	100	100	100	100	100	100	100	100	.	88.14	100	100	100	100	100	.	100	100	100	100
DAAGFG01	S. enteritidis	11	.	.	.	.	.	.	.	.	.	.	.	.	.	100	.	.	.	100	100	100	100	100	100	100	100	100	100	100	100	100	100	100	100	100	100	.	88.14	100	100	100	100	100	.	100	100	100	100
DAAGFH01	S. enteritidis	11	.	.	.	.	.	.	.	.	.	.	.	.	.	100	.	.	.	100	100	100	100	100	100	100	100	100	100	100	100	100	100	100	100	100	100	.	88.14	100	100	100	100	100	.	100	100	100	100
DAAGFI01	S. enteritidis	11	.	.	.	.	.	.	.	.	.	.	.	.	.	100	.	.	.	100	100	100	100	100	100	100	100	100	100	100	100	100	100	100	100	100	100	.	88.14	100	100	100	100	100	.	100	100	100	100
DAAGFJ01	S. enteritidis	11	.	.	.	.	.	.	.	.	.	.	.	.	.	100	.	.	.	100	100	100	100	100	100	100	100	100	100	100	100	100	100	100	96.22	100	100	.	88.14	100	100	100	100	100	.	100	100	100	100
DAAGFK01	S. enteritidis	11	.	.	.	.	.	.	.	.	.	.	.	.	.	100	.	.	.	100	100	100	100	100	100	100	100	100	100	100	100	100	100	100	100	100	100	.	88.14	100	100	100	100	100	.	100	100	100	100
DAAGFL01	S. enteritidis	11	.	.	.	.	.	.	.	.	.	.	.	.	.	100	.	.	.	100	100	100	100	100	100	100	100	100	100	100	100	100	100	100	100	100	100	.	88.14	100	100	100	100	100	.	100	100	100	100
DAAGFM01	S. enteritidis	11	.	.	.	.	.	.	.	.	.	.	.	.	.	100	.	.	.	100	100	100	100	100	100	100	100	100	100	100	100	100	100	100	100	100	100	.	88.14	100	100	100	100	100	.	100	100	100	100
DAAGFN01	S. enteritidis	11	.	.	.	.	.	.	.	.	.	.	.	.	.	100	.	.	.	100	100	100	100	100	100	100	100	100	100	100	100	100	100	100	100	100	100	.	88.14	100	100	100	100	100	.	100	100	100	100
DAAGFO01	S. enteritidis	11	.	.	.	.	.	.	.	.	.	.	.	.	.	100	.	.	.	100	100	100	100	100	100	100	100	100	100	100	100	100	100	100	100	100	100	.	88.14	100	100	100	100	100	.	100	100	100	100
DAAGFP01	S. enteritidis	11	.	.	.	.	.	.	.	.	.	.	.	.	.	100	.	.	.	100	100	100	100	100	100	100	100	100	100	100	100	100	100	100	100	100	100	.	88.14	100	100	100	100	100	.	100	100	100	100
DAAGFQ01	S. enteritidis	11	.	.	.	.	.	.	.	.	.	.	.	.	.	100	.	.	.	100	100	100	100	100	100	100	100	100	100	100	100	100	100	100	100	100	100	.	88.14	100	100	100	100	100	.	100	100	100	100
DAAGFR01	S. enteritidis	11	.	.	.	.	.	.	.	.	.	.	.	.	.	100	.	.	.	100	100	100	100	100	100	100	100	100	100	100	100	100	100	100	100	100	100	.	88.14	100	100	100	100	100	.	100	100	100	100
DAAGFS01	S. enteritidis	11	.	.	.	.	.	.	.	.	.	.	.	.	.	100	.	.	.	100	100	100	100	100	100	100	100	100	100	100	100	100	100	100	81.28	.	100	.	100	100	100	100	100	100	.	100	100	100	100
DAAGFT01	S. enteritidis	11	.	.	.	.	.	.	.	.	.	.	.	.	.	100	.	.	.	100	100	100	100	100	100	100	100	100	100	100	100	100	100	100	100	100	100	.	88.14	100	100	100	100	100	.	100	100	100	100
DAAGFU01	S. enteritidis	366	.	.	.	.	.	.	.	.	.	.	.	.	.	100	.	.	.	100	100	100	100	100	100	100	100	100	100	100	100	100	100	100	100	100	100	.	88.14	100	100	100	100	100	.	100	100	100	100
DAAGFV01	S. enteritidis	11	.	.	.	.	.	.	.	.	.	.	.	.	.	100	.	.	.	100	100	100	100	100	100	100	100	100	100	100	100	100	100	100	100	100	100	.	88.14	100	100	100	100	100	.	100	100	100	100
DAAGFW01	S. enteritidis	11	.	.	.	.	.	.	.	.	.	.	.	.	.	100	.	.	.	100	100	100	100	100	100	100	100	100	100	100	100	100	100	100	100	100	100	.	88.14	100	100	100	100	100	.	100	100	100	100
DAAGFX01	S. enteritidis	11	.	.	.	.	.	.	.	.	.	.	.	.	.	100	.	.	.	100	100	100	100	100	100	100	100	100	100	100	100	100	100	100	100	100	100	.	88.14	100	100	100	100	100	.	100	100	100	100
DAAGFY01	S. enteritidis	11	.	.	.	.	.	.	.	.	.	.	.	.	.	100	.	.	.	100	100	100	100	100	100	100	100	100	100	100	100	100	100	100	100	100	100	.	88.14	100	100	100	100	100	.	100	100	100	100
DAAGFZ01	S. enteritidis	11	.	.	.	.	.	.	.	.	.	.	.	.	.	100	.	.	.	100	100	100	100	100	100	100	100	100	100	100	100	100	100	100	100	100	100	.	88.14	100	100	100	100	100	.	100	100	100	100
DAAGGA01	S. enteritidis	11	.	.	.	.	.	.	.	.	.	.	.	.	.	100	.	.	.	100	100	100	100	100	100	100	100	100	100	100	100	100	100	100	100	100	100	.	88.14	100	100	100	100	100	.	100	100	100	100
DAAGGB01	S. enteritidis	11	.	.	.	.	.	.	.	.	.	.	.	.	.	100	.	.	.	100	100	100	100	100	100	100	100	100	100	100	100	100	100	100	100	100	100	.	88.14	100	100	100	100	100	.	100	100	100	100
DAAGGC01	S. enteritidis	11	.	.	.	.	.	.	.	.	.	.	.	.	.	100	.	.	.	100	100	100	100	100	100	100	100	100	100	100	100	100	100	100	100	100	100	.	88.14	100	100	100	100	100	.	100	100	100	100
DAAGGD01	S. enteritidis	11	.	.	.	.	.	.	.	.	.	.	.	.	.	100	.	.	.	100	100	100	100	100	100	100	100	100	100	100	100	100	100	100	100	100	100	.	88.14	100	100	100	100	100	.	100	100	100	100
DAAGGE01	S. enteritidis	11	.	.	.	.	.	.	.	.	.	.	.	.	.	100	.	.	.	100	100	100	100	100	100	100	100	100	100	100	100	100	100	100	100	100	100	.	88.14	100	100	100	100	100	.	100	100	100	100
DAAGGF01	S. enteritidis	11	.	.	.	.	.	.	.	.	.	.	.	.	.	100	.	.	.	100	100	100	100	100	100	100	100	100	100	100	100	100	100	100	100	100	100	.	88.14	100	100	100	100	100	.	100	100	100	100
DAAGGG01	S. enteritidis	11	.	.	.	.	.	.	.	.	.	.	.	.	.	100	.	.	.	100	100	100	100	100	100	100	100	100	100	100	100	100	100	100	100	100	100	.	88.14	100	100	100	100	100	.	100	100	100	100
DAAGGH01	S. enteritidis	11	.	.	.	.	.	.	.	.	.	.	.	.	.	100	.	.	.	100	100	100	100	100	100	100	100	100	100	100	100	100	100	100	100	100	100	.	88.14	100	100	100	100	100	.	100	100	100	100
DAAGGI01	S. enteritidis	11	.	.	.	.	.	.	.	.	.	.	.	.	.	100	.	.	.	100	100	100	100	100	100	100	100	100	100	100	100	100	100	100	100	100	100	.	88.14	100	100	100	100	100	.	100	100	100	100
DAAGGJ01	S. enteritidis	11	.	.	.	.	.	.	.	.	.	.	.	.	.	100	.	.	.	100	100	100	100	100	100	100	100	100	100	100	100	100	100	100	100	100	100	.	88.14	100	100	100	100	100	.	100	100	100	100
DAAGGK01	S. enteritidis	11	.	.	.	.	.	.	.	.	.	.	.	.	.	100	.	.	.	100	100	100	100	100	100	100	100	100	100	100	100	100	100	100	100	100	100	.	88.14	100	100	100	100	100	.	100	100	100	100
DAAGGL01	S. enteritidis	1983	.	.	.	.	.	.	.	.	.	.	.	.	.	100	.	.	.	100	100	100	100	100	100	100	100	100	100	100	100	100	100	100	100	100	100	.	88.14	100	100	100	100	100	.	100	100	100	100
DAAGGM01	S. enteritidis	11	.	.	.	.	.	.	.	.	.	.	.	.	.	100	.	.	.	100	100	100	100	100	100	100	100	100	100	100	100	100	100	100	.	100	100	.	100	100	100	100	100	100	.	100	100	100	100
DAAGGN01	S. enteritidis	11	.	.	.	.	.	.	.	.	.	.	.	.	.	100	.	.	.	100	100	100	100	100	100	100	100	100	100	100	100	100	100	100	100	100	100	.	88.14	100	100	100	100	100	.	100	100	100	100
DAAGGO01	S. enteritidis	11	.	.	.	.	.	.	.	.	.	.	.	.	.	100	.	.	.	100	100	100	100	100	100	100	100	100	100	100	100	100	100	100	100	100	100	.	88.14	100	100	100	100	100	.	100	100	100	100
DAAGGP01	S. enteritidis	11	.	.	.	.	.	.	.	.	.	.	.	.	.	100	.	.	.	100	100	100	100	100	100	100	100	100	100	100	100	100	100	100	100	100	100	.	88.14	100	100	100	100	100	.	100	100	100	100
DAAGGQ01	S. enteritidis	11	.	.	.	.	.	.	.	.	.	.	.	.	.	100	.	.	.	100	100	100	100	100	100	100	100	100	100	100	100	100	100	100	100	100	100	.	88.14	100	100	100	100	100	.	100	100	100	100
DAAGGR01	S. enteritidis	11	.	.	.	.	.	.	.	.	.	.	.	.	.	100	.	.	.	100	100	100	100	100	100	100	100	100	100	100	100	100	100	100	100	100	100	.	88.14	100	100	100	100	100	.	100	100	100	100
DAAGGS01	S. enteritidis	11	.	.	.	.	.	.	.	.	.	.	.	.	.	100	.	.	.	100	100	100	100	100	100	100	100	100	100	100	100	100	100	100	100	100	100	.	88.14	100	100	100	100	100	.	100	100	100	100
DAAGGT01	S. enteritidis	11	.	.	.	.	.	.	.	.	.	.	.	.	.	100	.	.	.	100	100	100	100	100	100	100	100	100	100	100	100	100	100	100	100	100	100	.	88.14	100	100	100	100	100	.	100	100	100	100
DAAGGU01	S. enteritidis	11	.	100	.	.	.	100	.	.	.	.	.	100	.	100	.	100	100	100	100	100	100	100	100	100	100	100	100	100	100	100	100	100	100	100	100	.	88.14	100	100	100	100	100	.	100	100	100	100
DAAGGV01	S. enteritidis	11	.	.	.	.	.	.	.	.	.	.	.	.	.	100	.	.	.	100	100	100	100	100	100	100	100	100	100	100	100	100	100	100	100	100	100	.	88.14	100	100	100	100	100	.	100	100	100	100
DAAGGW01	S. enteritidis	11	.	.	.	.	.	.	.	.	.	.	.	.	.	100	.	.	.	100	100	100	100	100	100	100	100	100	100	100	100	100	100	100	100	100	100	.	88.14	100	100	100	100	100	.	100	100	100	100
DAAGGX01	S. enteritidis	11	.	.	.	.	.	.	.	.	.	.	.	.	.	100	.	.	.	100	100	100	100	100	100	100	100	100	100	100	100	100	100	100	100	100	100	.	88.14	100	100	100	100	100	.	100	100	100	100
DAAGGY01	S. enteritidis	11	.	.	.	.	.	.	.	.	.	.	.	.	.	100	.	.	.	100	100	100	100	100	100	100	100	100	100	100	100	100	100	100	100	100	100	.	88.14	100	100	100	100	100	.	100	100	100	100
DAAGGZ01	S. enteritidis	11	.	.	.	.	.	.	.	.	.	.	.	.	.	100	.	.	.	100	100	100	100	100	100	100	100	100	100	100	100	100	100	100	100	100	100	.	88.14	100	100	100	100	100	.	100	100	100	100
DAAGHA01	S. enteritidis	11	.	.	.	.	.	.	.	.	.	.	.	.	.	100	.	.	.	100	100	100	100	100	100	100	100	100	100	100	100	100	100	100	100	100	100	.	88.14	100	100	100	100	100	.	100	100	100	100
DAAGHB01	S. enteritidis	11	.	.	.	.	.	.	.	.	.	.	.	.	.	100	.	.	.	100	100	100	100	100	100	100	100	100	100	100	100	100	100	100	100	100	100	.	88.14	100	100	100	100	100	.	100	100	100	100
DAAGHC01	S. enteritidis	11	.	100	.	.	.	100	.	.	.	.	.	100	.	100	.	100	100	100	100	100	100	100	100	100	100	100	100	100	100	100	100	100	100	100	100	.	88.14	100	100	100	100	100	.	100	100	100	100
DAAGHD01	S. enteritidis	11	.	.	.	.	.	.	.	.	.	.	.	.	.	100	.	.	.	100	100	100	100	100	100	100	100	100	100	100	100	100	100	100	100	100	100	.	88.14	100	100	100	100	100	.	100	100	100	100
DAAGHE01	S. enteritidis	11	.	.	.	.	.	.	.	.	.	.	.	.	.	100	.	.	.	100	100	100	100	100	100	100	100	100	100	100	100	100	100	100	100	100	100	.	88.14	100	100	100	100	100	.	100	100	100	100
DAAGHF01	S. enteritidis	11	100	100	.	.	100	.	.	.	.	.	.	.	100	100	.	.	.	100	100	100	100	100	100	100	100	100	100	100	100	100	.	.	.	.	100	.	88.14	100	100	100	100	100	.	100	100	100	.
DAAGHG01	S. enteritidis	11	.	100	.	.	.	.	.	.	.	.	.	.	.	100	.	.	.	100	100	100	100	100	100	100	100	100	100	100	100	100	.	.	.	.	100	.	88.14	100	100	100	100	100	.	100	100	100	.
DAAGHH01	S. enteritidis	11	.	.	.	.	.	.	.	.	.	.	.	.	.	100	.	.	.	100	100	100	100	100	100	100	100	100	100	100	100	100	100	100	100	100	100	.	88.14	100	100	100	100	100	.	100	100	100	100
DAAGHI01	S. enteritidis	11	.	100	.	.	.	.	.	.	.	.	.	.	.	100	.	.	.	100	100	100	100	100	100	100	100	100	100	100	100	100	.	.	.	.	100	.	88.14	100	100	100	100	100	.	100	100	100	.
DAAGHJ01	S. enteritidis	11	.	100	.	.	.	.	.	.	.	.	.	.	.	100	.	.	.	100	100	100	100	100	100	100	100	100	100	100	100	100	.	.	.	.	100	.	88.14	100	100	100	100	100	.	100	100	100	.
DAAGHK01	S. enteritidis	11	.	100	.	.	100	.	.	.	100	.	.	100	.	100	.	100	100	100	100	100	100	100	100	100	100	100	100	100	100	100	.	.	.	.	100	.	88.14	100	100	100	100	100	.	100	100	100	.
DAAGHL01	S. enteritidis	11	.	100	.	.	100	.	.	.	.	.	97.8	.	.	100	.	.	.	100	100	100	100	100	100	100	100	100	100	100	100	100	.	.	.	.	100	.	88.14	100	100	100	100	100	.	100	100	100	.
DAAGHM01	S. enteritidis	11	.	100	.	.	100	.	.	.	100	.	.	100	.	100	.	100	100	100	100	100	100	100	100	100	100	100	100	100	100	100	.	.	.	.	100	.	88.14	100	.	100	100	100	.	100	100	100	.
DAAGHN01	S. enteritidis	11	.	100	.	.	100	.	.	.	.	.	.	100	.	100	.	.	.	100	100	100	100	100	100	100	100	100	100	100	100	100	.	.	.	.	100	.	88.14	100	.	100	100	100	.	100	100	100	.
DAAGHO01	S. enteritidis	11	.	100	.	.	.	.	.	.	.	.	.	.	.	100	.	.	.	100	100	100	100	100	100	100	100	100	100	100	100	100	.	.	.	.	100	.	88.14	100	100	100	100	100	.	100	100	100	.
DAAGHP01	S. enteritidis	11	.	100	.	.	100	.	.	.	100	.	.	100	.	100	.	100	100	100	100	100	100	100	100	100	100	100	100	100	100	100	.	.	.	.	100	.	88.14	100	.	100	100	100	.	100	100	100	.
DAAGHQ01	S. enteritidis	11	.	100	.	.	100	.	.	.	100	.	.	100	.	100	.	100	100	100	100	100	100	100	100	100	100	100	100	100	100	100	.	.	.	.	100	.	88.14	100	.	100	100	100	.	100	100	100	.
DAAGHR01	S. enteritidis	11	.	100	.	.	.	.	.	.	.	.	.	.	.	100	.	.	.	100	100	100	100	100	100	100	100	100	100	100	100	100	.	.	.	.	100	.	88.14	100	100	100	100	100	.	100	100	100	.
DAAGHS01	S. enteritidis	11	.	100	.	.	100	.	.	.	100	.	.	100	.	100	.	100	100	100	100	100	100	100	100	100	100	100	100	100	100	100	.	.	.	.	100	.	88.14	100	100	100	100	100	.	100	100	100	.
DAAGHT01	S. enteritidis	11	.	100	.	.	100	.	.	.	.	.	97.8	.	.	100	99.88	.	100	100	100	100	100	100	100	100	100	100	100	100	100	100	100	100	100	100	100	.	88.14	100	100	100	100	100	.	100	100	100	100
DAAGHU01	S. enteritidis	11	.	.	.	.	.	.	.	.	.	.	.	.	.	100	.	.	.	100	100	100	100	100	100	100	100	100	100	100	100	100	100	100	100	100	100	.	88.14	100	100	100	100	100	.	100	100	100	100
DAAGHV01	S. enteritidis	11	.	100	.	.	100	.	.	.	.	.	.	100	.	100	.	.	.	100	100	100	100	100	100	100	100	100	100	100	100	100	.	.	.	.	100	.	88.14	100	.	100	100	100	.	100	100	100	.
DAAGHW01	S. enteritidis	11	.	100	.	.	100	.	.	.	.	.	97.8	.	.	100	.	.	.	100	100	100	100	100	100	100	100	100	100	100	100	100	.	.	.	.	100	.	88.14	100	100	100	100	100	.	100	100	100	.
DAAGHX01	S. enteritidis	11	.	100	.	.	100	.	.	.	100	.	.	100	.	100	.	100	100	100	100	100	100	100	100	100	100	100	100	100	100	100	.	.	.	.	100	.	88.14	100	.	100	100	100	.	100	100	100	.
DAAGHY01	S. enteritidis	11	.	100	.	.	100	.	.	.	100	.	.	100	.	100	.	100	98.09	100	100	100	100	100	100	100	100	100	100	100	100	100	.	.	.	.	100	.	88.14	100	100	100	100	100	.	100	100	100	.
DAAGHZ01	S. enteritidis	11	.	100	.	.	.	.	.	.	.	.	.	.	.	100	.	.	.	100	100	100	100	100	100	100	100	100	100	100	100	100	.	.	.	.	100	.	88.14	100	100	100	100	100	.	100	100	100	.
DAAGIA01	S. enteritidis	11	.	100	.	.	100	.	.	.	100	.	.	100	.	100	.	100	100	100	100	100	100	100	100	100	100	100	100	100	100	100	.	.	.	.	100	.	88.14	100	.	100	100	100	.	100	100	100	.
DAAGIB01	S. enteritidis	11	.	100	.	.	.	.	.	.	.	.	.	.	.	100	.	.	.	100	100	100	100	100	100	100	100	100	100	100	100	100	.	.	.	.	100	.	88.14	100	100	100	100	100	.	100	100	100	.
DAAGIC01	S. enteritidis	11	.	100	.	.	100	.	.	.	100	.	.	100	.	100	.	100	100	100	100	100	100	100	100	100	100	100	100	100	100	100	.	.	.	.	100	.	88.14	100	.	100	100	100	.	100	100	100	.
DAAGID01	S. enteritidis	11	.	100	.	.	100	.	.	.	.	.	97.8	.	.	100	.	.	.	100	100	100	100	100	100	100	100	100	100	100	100	100	.	.	.	.	100	.	88.14	100	100	100	100	100	.	100	100	100	.
DAAGIE01	S. enteritidis	11	.	100	.	.	100	.	.	.	100	.	.	100	.	100	.	100	100	100	100	100	100	100	100	100	100	100	100	100	100	100	.	.	.	.	100	.	88.14	100	.	100	100	100	.	100	100	100	.
DAAGIF01	S. enteritidis	11	.	100	.	.	.	.	.	.	.	.	.	.	.	100	.	.	.	100	100	100	100	100	100	100	100	100	100	100	100	100	.	.	.	.	100	.	88.14	100	100	100	100	100	.	100	100	100	.
DAAGIG01	S. enteritidis	11	.	100	.	.	100	.	.	.	.	.	97.8	.	.	100	.	.	.	100	100	100	100	100	100	100	100	100	100	100	100	100	.	.	.	.	100	.	88.14	100	100	100	100	100	.	100	100	100	.
DAAGIH01	S. enteritidis	11	.	100	.	.	100	.	.	.	100	.	.	100	.	100	.	100	100	100	100	100	100	100	100	100	100	100	100	100	100	100	.	.	.	.	100	.	88.14	100	.	100	100	100	.	100	100	100	.
DAAGII01	S. enteritidis	11	.	100	.	.	.	.	.	.	.	.	.	100	.	100	.	.	.	100	100	100	100	100	100	100	100	100	100	100	100	100	.	.	.	.	100	.	88.14	100	.	100	100	100	.	100	100	100	.
DAAGIJ01	S. enteritidis	11	.	100	.	.	100	.	.	.	100	.	.	100	.	100	.	100	100	100	100	100	100	100	100	100	100	100	100	100	100	100	.	.	.	.	100	.	88.14	100	.	100	100	100	.	100	100	100	.
DAAGIK01	S. enteritidis	11	.	100	.	.	100	.	.	.	100	.	.	100	.	100	.	100	100	100	100	100	100	100	100	100	100	100	100	100	100	100	.	.	.	.	100	.	88.14	100	.	100	100	100	.	100	100	100	.
DAAGIL01	S. enteritidis	11	.	.	.	.	.	.	.	.	.	.	.	.	.	100	.	.	.	100	100	100	100	100	100	100	100	100	100	100	100	100	100	100	100	100	100	.	88.14	100	100	100	100	100	.	100	100	100	100
DAAGIM01	S. enteritidis	11	.	100	.	.	.	100	.	.	.	.	.	.	.	100	.	100	100	100	100	100	100	100	100	100	100	100	100	100	100	100	.	.	.	.	100	.	88.14	100	100	100	100	100	.	100	100	100	.
DAAGIN01	S. enteritidis	11	.	100	.	.	.	.	.	.	.	.	.	.	.	100	.	.	.	100	100	100	100	100	100	100	100	100	100	100	100	100	.	.	.	.	100	.	88.14	100	100	100	100	100	.	100	100	100	.
DAAGIO01	S. enteritidis	11	.	.	.	.	.	.	.	.	.	.	.	.	.	100	.	.	.	100	100	100	100	100	100	100	100	100	100	100	100	100	100	100	100	100	100	.	88.14	100	100	100	100	100	.	100	100	100	100
DAAGIP01	S. enteritidis	11	.	100	.	.	100	.	.	100	100	.	.	.	.	100	99.88	.	100	100	100	100	100	100	100	100	100	100	100	100	100	100	100	100	100	100	100	.	88.14	100	100	100	100	100	.	100	100	100	100
DAAGIQ01	S. enteritidis	11	.	100	.	.	.	.	.	.	.	.	.	.	.	100	.	.	.	100	100	100	100	100	100	100	100	100	100	100	100	100	.	.	.	.	100	.	88.14	100	100	100	100	100	.	100	100	100	.
DAAGIR01	S. enteritidis	11	.	100	.	.	100	.	.	100	.	.	.	100	.	100	.	100	100	100	100	100	100	100	100	100	100	100	100	100	100	100	100	100	100	100	100	.	88.14	100	100	100	100	100	.	100	100	100	100
DAAGIS01	S. enteritidis	11	.	100	.	.	.	.	.	.	.	.	.	.	.	100	.	.	.	100	100	100	100	100	100	100	100	100	100	100	100	100	.	.	.	.	100	.	88.14	100	100	100	100	100	.	100	100	100	.
DAAGIT01	S. enteritidis	11	100	100	.	.	100	.	.	.	.	.	.	.	100	100	.	.	.	100	100	100	100	100	100	100	100	100	100	100	100	100	.	.	.	.	100	.	88.14	100	100	100	100	100	.	100	100	100	.
DAAGIU01	S. enteritidis	11	.	.	.	.	.	.	.	.	.	.	.	.	.	100	.	.	.	100	100	100	100	100	100	100	100	100	100	100	100	100	100	100	100	100	100	.	88.14	100	100	100	100	100	.	100	100	100	100
DAAGIV01	S. enteritidis	11	.	100	.	.	.	.	.	.	.	.	.	.	.	100	.	.	.	100	100	100	100	100	100	100	100	100	100	100	100	100	.	.	.	.	100	.	88.14	100	100	100	100	100	.	100	100	100	.
DAAGIW01	S. enteritidis	11	.	.	.	.	.	.	.	.	.	.	.	.	.	100	.	.	.	100	100	100	100	100	100	100	100	100	100	100	100	100	100	100	100	100	100	.	88.14	100	100	100	100	100	.	100	100	100	100
DAAGIX01	S. enteritidis	11	.	.	.	.	.	.	.	.	.	.	.	.	.	100	.	.	.	100	100	100	100	100	100	100	100	100	100	100	100	100	100	100	100	100	100	.	88.14	100	100	100	100	100	.	100	100	100	100
DAAGIY01	S. enteritidis	11	.	.	.	.	.	.	.	.	.	.	.	.	.	100	.	.	.	100	100	100	100	100	100	100	100	100	100	100	100	100	100	100	100	100	100	.	88.14	100	100	100	100	100	.	100	100	100	100
DAAGIZ01	S. enteritidis	11	.	.	.	.	.	.	.	.	.	.	.	.	.	100	.	.	.	100	100	100	100	100	100	100	100	100	100	100	100	100	100	100	100	100	100	.	88.14	100	100	100	100	100	.	100	100	100	100
DAAGJA01	S. enteritidis	11	.	.	.	.	.	.	.	.	.	.	.	.	.	100	.	.	.	100	100	100	100	100	100	100	100	100	100	100	100	100	.	.	.	.	100	.	88.14	100	100	100	100	100	.	100	100	100	.
DAAGJB01	S. enteritidis	11	.	.	.	.	.	.	.	.	.	.	.	.	.	100	.	.	.	100	100	100	100	100	100	100	100	100	100	100	100	100	100	100	100	100	100	.	88.14	100	100	100	100	100	.	100	100	100	100
DAAGJC01	S. enteritidis	11	.	.	.	.	.	.	.	.	.	.	.	.	.	100	.	.	.	100	100	100	100	100	100	100	100	100	100	100	100	100	100	100	100	100	100	.	88.14	100	100	100	100	100	.	100	100	100	100
DAAGJD01	S. enteritidis	11	.	100	.	.	.	.	.	.	.	.	.	.	.	100	.	.	.	100	100	100	100	100	100	100	100	100	100	100	100	100	.	.	.	.	100	.	88.14	100	100	100	100	100	.	100	100	100	.
DAAGJE01	S. enteritidis	11	.	.	.	.	.	.	.	.	.	.	.	.	.	100	.	.	.	100	100	100	100	100	100	100	100	100	100	100	100	100	100	100	100	100	100	.	88.14	100	100	100	100	100	.	100	100	100	100
DAAGJF01	S. enteritidis	11	.	.	.	.	.	.	.	.	.	.	.	.	.	100	.	.	.	100	100	100	100	100	100	100	100	100	100	100	100	100	100	100	100	100	100	.	88.14	100	100	100	100	100	.	100	100	100	100
DAAGJG01	S. enteritidis	11	.	.	.	.	.	.	.	.	.	.	.	.	.	100	.	.	.	100	100	100	100	100	100	100	100	100	100	100	100	100	100	100	100	100	100	.	88.14	100	100	100	100	100	.	100	100	100	100
DAAGJH01	S. enteritidis	11	.	.	.	.	.	.	.	.	.	.	.	.	.	100	.	.	.	100	100	100	100	100	100	100	100	100	100	100	97.35	100	100	100	100	100	100	.	88.14	100	100	100	100	100	.	100	100	100	.
DAAGJI01	S. enteritidis	11	.	.	.	.	.	.	.	.	.	.	.	.	.	100	.	.	.	100	100	100	100	100	100	100	100	100	100	100	100	100	100	100	100	100	99.38	.	88.14	100	100	100	100	100	.	100	100	100	100
DAAGJJ01	S. enteritidis	11	.	.	.	.	.	.	.	.	.	.	.	.	.	100	.	.	.	100	100	100	100	100	100	100	100	100	100	100	100	100	.	.	.	.	100	.	88.14	100	100	100	100	100	.	100	100	100	.
DAAGJK01	S. enteritidis	11	.	.	.	.	.	.	.	.	.	.	.	.	.	100	.	.	.	100	100	100	100	100	100	100	100	100	100	100	100	100	.	.	.	.	100	.	100	100	100	100	100	100	.	100	100	100	100
DAAGJL01	S. enteritidis	11	.	.	.	.	.	.	.	.	.	.	.	.	.	100	.	.	.	100	100	100	100	100	100	100	100	100	100	100	97.35	100	100	100	100	100	100	.	88.14	100	100	100	100	100	.	100	100	100	.
DAAGJM01	S. enteritidis	11	.	.	.	.	.	.	.	.	.	.	.	.	.	100	.	.	.	100	100	100	100	100	100	100	100	100	100	100	97.35	100	100	100	100	100	100	.	88.14	100	100	100	100	100	.	100	100	100	.
DAAGJN01	S. enteritidis	11	.	.	.	.	.	.	.	.	.	.	.	.	.	100	.	.	.	100	100	100	100	100	100	100	100	100	100	100	100	99.48	.	.	.	.	100	.	100	100	100	100	100	100	100	100	100	100	.
DAAGJO01	S. enteritidis	11	.	.	.	.	.	.	.	.	.	.	.	.	.	100	.	.	.	100	100	100	100	100	100	100	100	100	100	100	100	100	100	100	100	100	100	.	88.14	100	100	100	100	100	.	100	100	100	100
DAAGJP01	S. enteritidis	-	.	.	.	.	.	.	.	.	.	.	.	.	.	100	.	.	.	100	100	100	100	100	100	100	100	100	100	100	100	99.48	.	.	.	.	100	.	100	100	100	100	100	100	100	100	100	100	.
DAAGJQ01	S. enteritidis	11	.	.	.	.	.	.	.	.	.	.	.	.	.	100	.	.	.	100	100	100	100	100	100	100	100	100	100	100	100	100	100	100	100	100	100	.	88.14	100	100	100	100	100	.	100	100	100	100
DAAGJR01	S. enteritidis	11	.	.	.	.	.	.	.	.	.	.	.	.	.	100	.	.	.	100	100	100	100	100	100	100	100	100	100	100	100	100	100	100	100	100	100	.	88.14	100	100	100	100	100	.	100	100	100	100
DAAGJS01	S. enteritidis	11	.	.	.	.	.	.	.	.	.	.	.	.	.	100	.	.	.	100	100	100	100	100	100	100	100	100	100	100	100	100	.	.	.	.	100	.	88.14	100	100	100	100	100	.	100	100	100	.
DAAGJT01	S. enteritidis	11	.	.	.	.	.	.	.	.	.	.	.	.	.	100	.	.	.	100	100	100	100	100	100	100	100	99.71	100	100	100	99.48	.	.	.	.	100	.	100	100	100	100	100	100	100	100	100	100	.
DAAGJU01	S. enteritidis	11	.	.	.	.	.	.	.	.	.	.	.	.	.	100	.	.	.	100	100	100	100	100	100	100	100	100	100	100	100	100	100	100	100	100	100	.	88.14	100	100	100	100	100	.	100	100	100	100
DAAGJV01	S. enteritidis	11	.	.	.	.	.	.	.	.	.	.	.	.	.	100	.	.	.	100	100	100	100	100	100	100	100	100	100	100	100	100	100	100	100	100	100	.	88.14	100	100	100	100	100	.	100	100	100	100
DAAGJW01	S. enteritidis	11	.	100	.	.	100	.	.	.	.	.	97.8	.	.	100	99.88	.	100	100	100	100	100	100	100	100	100	100	100	100	100	100	100	100	100	100	100	.	88.14	100	100	100	100	100	.	100	100	100	100
DAAGJX01	S. enteritidis	11	.	100	.	.	100	.	.	.	.	.	97.8	.	.	100	99.88	.	100	100	100	100	100	100	100	100	100	100	100	100	100	100	100	100	100	100	100	.	88.14	100	100	100	100	100	.	100	100	100	100
DAAGJY01	S. enteritidis	11	.	.	.	.	.	.	.	.	.	.	.	.	.	100	.	.	.	100	100	100	100	100	100	100	100	100	100	100	100	100	100	100	100	100	100	.	88.14	100	100	100	100	100	.	100	100	100	100
DAAGJZ01	S. enteritidis	11	.	.	.	.	.	.	.	.	.	.	.	.	.	100	.	.	.	100	100	100	100	100	100	100	100	100	100	100	100	100	100	100	100	100	100	.	88.14	100	100	100	100	100	.	100	100	100	100
DAAGKA01	S. enteritidis	136	.	.	.	.	.	.	.	.	.	.	.	.	.	100	.	.	.	100	100	100	100	100	100	100	100	100	99.96	100	100	100	100	100	100	100	100	.	100	100	100	100	100	100	100	100	100	100	100
DAAGKB01	S. enteritidis	11	.	.	.	.	.	.	.	.	.	.	.	.	.	100	.	.	.	100	100	100	100	100	100	100	100	100	100	100	100	100	100	100	100	100	100	.	88.14	100	100	100	100	100	.	100	100	100	100
DAAGKC01	S. enteritidis	11	.	100	.	.	100	.	.	.	100	.	.	.	.	100	.	100	100	100	100	100	100	100	100	100	100	100	100	100	100	100	.	.	.	.	100	.	88.14	100	.	100	100	100	.	100	100	100	.
DAAGKD01	S. enteritidis	11	.	.	.	.	.	.	.	.	.	.	.	.	.	100	.	.	.	100	100	100	100	100	100	100	100	100	99.17	100	100	100	100	100	100	100	100	.	88.14	100	100	100	100	100	.	100	100	100	100
DAAGKE01	S. enteritidis	136	.	.	.	.	.	.	.	.	.	.	97.8	.	.	100	.	.	.	100	100	100	100	100	100	100	100	100	100	100	100	100	100	100	100	100	100	.	88.14	100	100	100	100	100	.	100	100	100	100
DAAGKF01	S. enteritidis	136	.	.	.	.	.	.	.	.	.	.	.	.	.	100	.	.	.	100	100	100	100	100	100	100	100	100	100	100	100	100	.	.	.	.	100	.	88.14	100	100	100	100	100	.	100	100	100	.
DAAGKG01	S. enteritidis	183	.	.	.	.	.	.	.	.	.	.	.	.	.	100	.	.	.	100	100	100	100	100	100	100	100	100	100	100	100	100	100	100	100	100	100	.	88.14	100	100	100	100	100	.	100	100	100	100
DAAGKH01	S. enteritidis	11	.	.	.	.	.	.	.	.	.	.	.	.	.	100	.	.	.	100	100	100	100	100	100	100	100	100	100	100	100	100	100	100	100	100	100	.	88.14	100	100	100	100	100	.	100	100	100	100
DAAGKI01	S. enteritidis	183	.	.	.	.	.	.	.	.	.	.	.	.	.	100	.	.	.	100	100	100	100	100	100	100	100	100	100	100	100	100	100	100	100	100	100	.	88.14	100	100	100	100	100	.	100	100	100	100
DAAGKJ01	S. enteritidis	745	.	100	.	.	100	.	.	.	100	.	97.8	.	.	100	99.88	.	100	100	100	100	100	100	100	100	100	100	100	100	100	100	100	100	100	100	100	.	88.14	100	100	100	100	100	.	100	100	100	100
DAAGKK01	S. enteritidis	11	.	100	.	.	.	.	.	.	.	.	97.8	.	.	100	99.88	.	100	100	100	100	100	100	100	100	100	100	100	100	100	100	100	100	100	100	100	.	88.14	100	100	100	100	100	.	100	100	100	100
DAAGKL01	S. enteritidis	1978	.	.	.	.	.	.	.	.	.	.	.	.	.	100	.	.	.	100	100	100	100	100	100	100	100	100	100	100	100	100	100	100	100	100	100	.	88.14	100	100	100	100	100	.	100	100	100	100
DAAGKM01	S. enteritidis	2107	.	.	.	.	100	.	.	.	100	.	97.8	.	.	100	99.88	.	77.66	100	100	100	100	100	100	100	100	100	100	100	100	100	100	100	100	100	100	.	88.14	100	100	100	100	100	.	100	100	100	100
DAAGKN01	S. enteritidis	11	.	.	.	.	.	.	.	.	.	.	.	.	.	100	.	.	.	100	100	100	100	100	100	100	100	100	100	100	100	100	100	100	100	100	100	.	88.14	100	100	100	100	100	.	100	100	100	100
DAAGKO01	S. enteritidis	11	.	.	.	.	.	.	.	.	.	.	.	.	.	100	.	.	.	100	100	100	100	100	100	100	100	100	100	100	100	100	100	100	100	100	100	.	88.14	100	100	100	100	100	.	100	100	100	100
DAAGKP01	S. enteritidis	11	.	.	.	.	.	.	.	.	.	.	.	.	.	100	.	.	.	100	100	100	100	100	100	100	100	100	100	100	100	100	100	100	100	100	100	.	88.14	100	100	100	100	100	.	100	100	100	100
DAAGKQ01	S. enteritidis	11	.	.	.	.	.	.	.	.	.	.	.	.	.	100	.	.	.	100	100	100	100	100	100	100	100	100	100	100	100	100	100	100	100	100	100	.	88.14	100	100	100	100	100	.	100	100	100	100
DAAGKR01	S. enteritidis	11	.	.	.	.	.	.	.	.	.	.	.	.	.	100	.	.	.	100	100	100	100	100	100	100	100	100	100	100	100	100	100	.	.	100	100	.	88.14	100	100	100	100	100	.	100	100	100	.
DAAGKS01	S. enteritidis	11	.	.	.	.	.	.	.	.	.	.	.	.	.	100	.	.	.	100	100	100	100	100	100	100	100	100	100	100	100	100	100	100	100	100	100	.	88.14	100	100	100	100	100	.	100	100	100	100
DAAGKT01	S. enteritidis	11	.	100	.	.	100	.	.	.	100	.	97.8	.	.	100	.	.	100	100	100	100	100	100	100	100	100	100	100	100	100	100	100	100	100	100	100	.	88.14	100	100	100	100	100	.	100	100	100	100
DAAGKU01	S. enteritidis	11	.	.	.	.	.	.	.	.	.	.	.	.	.	100	.	.	.	100	100	100	100	100	100	100	100	100	100	100	100	100	100	100	100	100	100	.	88.14	100	100	100	100	100	.	100	100	100	100
DAAGKV01	S. enteritidis	11	.	100	.	.	100	.	.	.	100	.	97.8	.	.	100	99.88	.	100	100	100	100	100	100	100	100	100	100	100	100	100	100	100	100	100	100	100	.	88.14	100	100	100	100	100	.	100	100	100	100
DAAGKW01	S. enteritidis	11	.	100	.	.	100	.	.	.	100	.	97.8	.	.	100	99.88	.	100	100	100	100	100	100	100	100	100	100	100	100	100	100	100	100	100	100	100	.	88.14	100	100	100	100	100	.	100	100	100	100
DAAGKX01	S. enteritidis	11	.	100	.	.	100	.	.	.	100	.	97.8	.	.	100	99.88	.	100	100	100	100	100	100	100	100	100	100	100	100	100	100	100	100	100	100	100	.	88.14	100	100	100	100	100	.	100	100	100	100
DAAGKY01	S. enteritidis	11	.	.	.	.	.	.	.	.	.	.	.	.	.	100	.	.	.	100	100	100	100	100	100	100	100	100	100	100	100	100	100	100	100	100	100	.	88.14	100	100	100	100	100	.	100	100	100	100
DAAGKZ01	S. enteritidis	11	.	100	.	.	100	.	.	.	100	.	97.8	.	.	100	99.88	.	77.66	100	100	100	100	100	100	100	100	100	100	100	100	100	100	100	100	100	100	.	88.14	100	100	100	100	100	.	100	100	100	100
DAAGLA01	S. enteritidis	11	.	100	.	.	100	.	.	.	100	.	97.8	.	.	100	99.88	.	100	100	100	100	100	100	100	100	100	100	100	100	100	100	100	100	100	100	100	.	88.14	100	100	100	100	100	.	100	100	100	100
DAAGLB01	S. enteritidis	11	.	100	.	.	100	.	.	.	100	.	97.8	.	.	100	99.88	.	77.54	100	100	100	100	100	100	100	100	100	100	100	100	100	100	100	100	100	100	.	88.14	100	100	100	100	100	.	100	100	100	100
DAAGLC01	S. enteritidis	11	.	.	.	.	.	.	.	.	.	.	.	.	.	100	.	.	.	100	100	100	100	100	100	100	100	100	100	100	100	100	100	100	100	100	100	.	88.14	100	100	100	100	100	.	100	100	100	100
DAAGLE01	S. enteritidis	11	.	100	.	.	100	.	.	.	100	.	97.8	.	.	100	99.88	.	100	100	100	100	100	100	100	100	100	100	100	100	100	100	100	100	100	100	100	.	88.14	100	100	100	100	100	.	100	100	100	100
DAAHLX01	S. enteritidis	11	.	.	.	.	.	.	.	.	.	.	.	.	.	100	.	.	.	100	100	100	100	100	100	100	100	100	100	100	100	100	100	100	100	100	100	.	88.14	100	100	100	100	100	.	100	100	100	100
DAAHPV01	S. enteritidis	11	.	.	.	.	.	.	.	.	.	.	.	.	.	100	.	.	.	100	100	100	100	100	100	100	100	100	100	100	100	100	100	100	100	100	100	.	88.14	100	100	100	100	100	.	100	100	100	100
DAAMCK01	S. enteritidis	11	.	.	.	.	.	.	.	.	.	.	.	.	.	100	.	.	.	100	100	100	100	100	100	100	100	100	100	100	100	100	100	100	100	100	100	.	88.14	100	100	100	100	100	.	100	100	100	100
DAAMCP01	S. enteritidis	11	.	100	.	.	100	.	.	.	100	.	97.8	.	.	100	99.88	.	100	100	100	100	100	100	100	100	100	100	100	100	100	100	100	100	100	100	100	.	88.14	100	100	100	100	100	.	100	100	100	100
DAAMCR01	S. enteritidis	11	.	.	.	.	.	.	.	.	.	.	.	.	.	100	.	.	.	100	100	100	100	100	100	100	100	100	100	100	100	100	100	100	100	100	100	.	88.14	100	100	100	100	100	.	100	100	100	79.75
DAAQMV01	S. enteritidis	11	.	100	.	.	100	.	.	.	100	.	97.8	.	.	100	99.88	.	77.54	100	100	100	100	100	100	100	100	100	100	100	100	100	100	100	100	100	100	.	88.14	100	100	100	100	100	.	100	100	100	100
DAAQNB01	S. enteritidis	11	.	100	.	.	100	.	.	.	100	.	97.8	.	.	100	99.88	.	100	100	100	100	100	100	100	100	100	100	100	100	100	100	100	100	100	100	100	.	88.14	100	100	100	100	100	.	100	100	100	100
DAAQND01	S. enteritidis	11	.	.	.	.	.	.	.	.	.	.	.	.	.	100	.	.	.	100	100	100	100	100	100	100	100	100	100	100	100	100	100	100	79	.	100	.	88.14	100	100	100	100	100	.	100	100	100	100
DAAQNE01	S. enteritidis	11	.	100	.	.	100	.	.	.	100	.	97.8	.	.	100	99.88	.	77.54	100	100	100	100	100	100	100	100	100	100	100	100	100	100	100	100	100	100	.	88.14	100	100	100	100	100	.	100	100	100	100
DAAQNH01	S. enteritidis	11	.	.	.	.	.	.	.	.	.	.	.	.	.	100	.	.	.	100	100	100	100	100	100	100	100	100	100	100	100	100	100	100	100	100	100	.	88.14	100	100	100	100	100	.	100	100	100	100
DAAQNJ01	S. enteritidis	11	.	100	.	.	100	.	.	.	100	.	97.8	.	.	100	99.88	.	100	100	100	100	100	100	100	100	100	100	100	100	100	100	100	100	100	100	100	.	88.14	100	100	100	100	100	.	100	100	100	100
DAAQNK01	S. enteritidis	11	.	100	.	.	100	.	.	.	100	.	97.8	.	.	100	99.88	.	77.54	100	100	100	100	100	100	100	100	100	100	100	100	100	100	100	100	100	100	.	88.14	100	100	100	100	100	.	100	100	100	100
DAAQNL01	S. enteritidis	11	.	100	.	.	100	.	.	.	100	.	.	.	.	100	99.88	.	100	100	100	100	100	100	100	100	100	100	100	100	100	100	100	100	100	100	100	.	88.14	100	100	100	100	100	.	100	100	100	100
DAAQNP01	S. enteritidis	11	.	.	.	.	.	.	.	.	.	.	.	.	.	100	.	.	.	100	100	100	100	100	100	100	100	100	100	100	100	100	100	100	100	100	100	.	88.14	100	100	100	100	100	.	100	100	100	100
DAAQNU01	S. enteritidis	11	.	100	.	.	100	.	.	.	100	.	97.8	.	.	100	99.88	.	100	100	100	100	100	100	100	100	100	100	100	100	100	100	100	100	100	100	100	.	88.14	100	100	100	100	100	.	100	100	100	100
DAAQNV01	S. enteritidis	11	.	100	.	.	.	.	.	.	100	.	97.8	.	.	100	99.88	.	100	100	100	100	100	100	100	100	100	100	100	100	100	100	100	100	100	100	100	.	88.14	100	100	100	100	100	.	100	100	100	100
DAAQNW01	S. enteritidis	11	.	100	.	.	100	.	.	.	100	.	97.8	.	.	100	99.88	.	100	100	100	100	100	100	100	100	100	100	100	100	100	100	100	100	100	100	100	.	88.14	100	100	100	100	100	.	100	100	100	100
DAAQNX01	S. enteritidis	11	.	.	.	.	.	.	.	.	.	.	.	.	.	100	.	.	.	100	100	100	100	100	100	100	100	100	100	100	100	100	100	100	100	100	100	.	88.14	100	100	100	100	100	.	100	100	100	100
DAAQNY01	S. enteritidis	11	.	100	.	.	100	.	.	.	100	.	97.8	.	.	100	99.88	.	77.54	100	100	100	100	100	100	100	100	100	100	100	100	100	100	100	100	100	100	.	88.14	100	100	100	100	100	.	100	100	100	100
DAAQNZ01	S. enteritidis	11	.	100	.	.	100	.	.	.	100	.	97.8	.	.	100	99.88	.	100	100	100	100	100	100	100	100	100	100	100	100	100	100	100	100	100	100	100	.	88.14	100	100	100	100	100	.	100	100	100	100
DAAQOA01	S. enteritidis	11	.	100	.	.	100	.	.	.	100	.	97.8	.	.	100	99.88	.	100	100	100	100	100	100	100	100	100	100	100	100	100	100	100	100	.	.	100	.	88.14	100	100	100	100	100	.	100	100	100	100
DAAQOC01	S. enteritidis	11	.	.	.	.	.	.	.	.	.	.	.	.	.	100	.	.	.	100	100	100	100	100	100	100	100	100	100	100	100	100	100	100	100	100	100	.	88.14	100	100	100	100	100	.	100	100	100	100
DAAQOE01	S. enteritidis	11	.	.	.	.	.	.	.	.	.	.	.	.	.	100	.	.	.	100	100	100	100	100	100	100	100	100	100	100	100	100	100	100	100	100	100	.	88.14	100	100	100	100	100	.	100	100	100	100
DAAQOF01	S. enteritidis	11	.	100	.	.	100	.	.	.	100	.	97.8	.	.	100	99.88	.	100	100	100	100	100	100	100	100	100	100	100	100	100	100	100	100	100	100	100	.	88.14	100	100	100	100	100	.	100	100	100	100
DAAQOH01	S. enteritidis	11	.	.	.	.	.	.	.	.	.	.	.	.	.	100	.	.	.	100	100	100	100	100	100	100	100	100	100	100	100	100	100	100	100	100	100	.	88.14	100	100	100	100	100	.	100	100	100	100
DAAQOJ01	S. enteritidis	11	.	100	.	.	100	.	.	.	100	.	97.8	.	.	100	99.88	.	100	100	100	100	100	100	100	100	100	100	100	100	100	100	100	100	100	100	100	.	88.14	100	100	100	100	100	.	100	100	100	100
DAAQOK01	S. enteritidis	11	.	100	.	.	100	.	.	.	100	.	97.8	.	.	100	99.88	.	100	100	100	100	100	100	100	100	100	100	100	100	100	100	100	100	100	100	100	.	88.14	100	100	100	100	100	.	100	100	100	100
DAAQOL01	S. enteritidis	11	.	.	.	.	.	.	.	.	.	.	.	.	.	100	.	.	.	100	100	100	100	100	100	100	100	100	100	100	100	100	100	100	100	100	100	.	88.14	100	100	100	100	100	.	100	100	100	100
DAAQOP01	S. enteritidis	11	.	100	.	.	100	.	.	.	100	.	97.8	.	.	100	99.88	.	77.54	100	100	100	100	100	100	100	100	100	100	100	100	100	100	100	100	100	100	.	88.14	100	100	100	100	100	.	100	100	100	100
DAAQOU01	S. enteritidis	11	.	.	.	.	.	.	.	.	.	.	.	.	.	100	.	.	.	100	100	100	100	100	100	100	100	100	100	100	100	100	100	100	100	100	100	.	88.14	100	100	100	100	100	.	100	100	100	100
DAAQOX01	S. enteritidis	11	.	100	.	.	100	.	.	.	100	.	97.8	.	.	100	99.88	.	100	100	100	100	100	100	100	100	100	100	100	100	100	100	100	100	100	100	100	.	88.14	100	100	100	100	100	.	100	100	100	100
DAAQOZ01	S. enteritidis	11	.	100	.	.	100	.	.	.	100	.	97.8	.	.	100	99.88	.	77.66	100	100	100	100	100	100	100	100	100	100	100	100	100	100	100	100	100	100	.	88.14	100	100	100	100	100	.	100	100	100	100
DAAQPA01	S. enteritidis	11	.	.	.	.	.	.	.	.	.	.	.	.	.	100	.	.	.	100	100	100	100	100	100	100	100	100	100	100	100	100	100	100	100	100	100	.	88.14	100	100	100	100	100	.	100	100	100	100
DAAQPC01	S. enteritidis	11	.	.	.	.	.	.	.	.	.	.	.	.	.	100	.	.	.	100	100	100	100	100	100	100	100	100	100	100	100	100	100	100	100	100	100	.	88.14	100	100	100	100	100	.	100	100	100	100
DAAQPE01	S. enteritidis	11	.	.	.	.	.	.	.	.	.	.	.	.	.	100	.	.	.	100	100	100	100	100	100	100	100	100	100	100	100	100	100	100	100	100	100	.	88.14	100	100	100	100	100	.	100	100	100	100
DAAQPF01	S. enteritidis	11	.	100	.	.	100	.	.	.	100	.	97.8	.	.	100	99.88	.	77.66	100	100	100	100	100	100	100	100	100	100	100	100	100	100	100	100	100	100	.	88.14	100	100	100	100	100	.	100	100	100	100
DAAQPG01	S. enteritidis	11	.	100	.	.	100	.	.	.	100	.	97.8	.	.	100	99.88	.	100	100	100	100	100	100	100	100	100	100	100	100	100	100	100	100	100	100	100	.	88.14	100	100	100	100	100	.	100	100	100	100
DAAQPH01	S. enteritidis	11	.	100	.	.	100	.	.	.	100	.	97.8	.	.	100	99.88	.	100	100	100	100	100	100	100	100	100	100	100	100	100	100	100	100	100	100	100	.	88.14	100	100	100	100	100	.	100	100	100	100
DAAQPI01	S. enteritidis	11	.	100	.	.	100	.	.	.	100	.	97.8	.	.	100	99.88	.	100	100	100	100	100	100	100	100	100	100	100	100	100	100	100	100	100	100	100	.	88.14	100	100	100	100	100	.	100	100	100	100
DAAQPJ01	S. enteritidis	11	.	100	.	.	100	.	.	.	100	.	97.8	.	.	100	99.88	.	100	100	100	100	100	100	100	100	100	100	100	100	100	100	100	100	100	100	100	.	88.14	100	100	100	100	100	.	100	100	100	100
DAAQPK01	S. enteritidis	11	.	100	.	.	100	.	.	.	100	.	97.8	.	.	100	99.88	.	100	100	100	100	100	100	100	100	100	100	100	100	100	100	100	100	100	100	100	.	88.14	100	100	100	100	100	.	100	100	100	100
DAAQPN01	S. enteritidis	11	.	100	.	.	100	.	.	.	100	.	97.8	.	.	100	99.88	.	100	100	100	100	100	100	100	100	100	100	100	100	100	100	100	100	100	100	100	.	88.14	100	100	100	100	100	.	100	100	100	100
DAAQPP01	S. enteritidis	11	.	100	.	.	100	.	.	.	100	.	97.8	.	.	100	.	.	100	100	100	100	100	100	100	100	100	100	100	100	100	100	100	100	100	100	100	.	88.14	100	100	100	100	100	.	100	100	100	100
DAAQPR01	S. enteritidis	11	.	100	.	.	100	.	.	.	100	.	97.8	.	.	100	99.88	.	77.54	100	100	100	100	100	100	100	100	100	100	100	100	100	100	100	100	100	100	.	88.14	100	100	100	100	100	.	100	100	100	100
DAAQPS01	S. enteritidis	11	.	100	.	.	100	.	79.66	.	100	.	97.8	.	.	100	99.88	.	77.54	100	100	100	100	100	100	100	100	100	100	100	100	100	100	100	100	100	100	.	88.14	100	100	100	100	100	.	100	100	100	100
DAAQPT01	S. enteritidis	11	.	.	.	.	.	.	.	.	.	.	.	.	.	100	.	.	.	100	100	100	100	100	100	100	100	100	100	100	100	100	100	100	100	100	100	.	88.14	100	100	100	100	100	.	100	100	100	100
DAAQPU01	S. enteritidis	11	.	100	.	.	100	.	.	.	100	.	97.8	.	.	100	99.88	.	100	100	100	100	100	100	100	100	100	100	100	100	100	100	100	100	100	100	100	.	88.14	100	100	100	100	100	.	100	100	100	100
DAAQPX01	S. enteritidis	11	.	.	.	.	.	.	.	.	.	.	.	.	.	100	.	.	.	100	100	100	100	100	100	100	100	100	100	100	100	100	100	100	100	100	100	.	88.14	100	100	100	100	100	.	100	100	100	100
DAAQPY01	S. enteritidis	11	.	100	.	.	100	.	.	.	100	.	97.8	.	.	100	99.88	.	77.54	100	100	100	100	100	100	100	100	100	100	100	100	100	100	100	100	100	100	.	88.14	100	100	100	100	100	.	100	100	100	100
DAAQPZ01	S. enteritidis	11	.	100	.	.	100	.	.	.	100	.	97.8	.	.	100	99.88	.	77.66	100	100	100	100	100	100	100	100	100	100	100	100	100	100	100	100	100	100	.	88.14	100	100	100	100	100	.	100	100	100	100
DAAQQC01	S. enteritidis	11	.	100	.	.	100	.	.	.	100	.	97.8	.	.	100	99.88	.	77.54	100	100	100	100	100	100	100	100	100	100	100	100	100	100	100	77.25	100	100	.	88.14	100	100	100	100	100	.	100	100	100	100
DAAQQE01	S. enteritidis	11	.	100	.	.	100	.	.	.	100	.	97.8	.	.	100	99.88	.	77.54	100	100	100	100	100	100	100	100	100	100	100	100	100	100	100	100	100	100	.	88.14	100	100	100	100	100	.	100	100	100	100
DAAQQF01	S. enteritidis	11	.	100	.	.	100	.	.	.	.	.	97.8	.	.	100	.	.	.	100	100	100	100	100	100	100	100	100	100	100	100	100	100	100	100	100	100	.	88.14	100	100	100	100	100	.	100	100	100	100
DAAQQI01	S. enteritidis	11	.	.	.	90.95	.	.	.	.	100	.	97.8	.	.	100	99.88	.	77.54	100	100	100	100	100	100	100	100	100	100	100	100	100	100	100	100	100	100	.	88.14	100	100	100	100	100	.	100	100	100	100
DAAQQL01	S. enteritidis	11	.	100	.	.	.	.	.	.	100	.	97.8	.	.	100	99.88	.	100	100	100	100	100	100	100	100	100	100	100	100	100	100	100	100	100	100	100	.	88.14	100	100	100	100	100	.	100	100	100	100
DAAQQV01	S. enteritidis	11	.	100	.	.	100	.	.	.	100	.	97.8	.	.	100	99.88	.	77.54	100	100	100	100	100	100	100	100	100	100	100	100	100	100	100	100	100	100	.	88.14	100	100	100	100	100	.	100	100	100	100
DAAQQY01	S. enteritidis	11	.	100	.	.	100	.	.	.	100	.	97.8	.	.	100	99.88	.	100	100	100	100	100	100	100	100	100	100	100	100	100	100	100	100	100	100	100	.	88.14	100	100	100	100	100	.	100	100	100	100
DAAQRB01	S. enteritidis	11	.	100	.	.	100	.	.	.	100	.	97.8	.	.	100	99.88	.	77.66	100	100	100	100	100	100	100	100	100	100	100	100	100	100	100	100	100	100	.	88.14	100	100	100	100	100	.	100	100	100	100
DAAQRF01	S. enteritidis	11	.	100	.	.	100	.	.	.	100	.	97.8	.	.	100	99.88	.	77.54	100	100	100	100	100	100	100	100	100	100	100	100	100	100	100	100	100	100	.	88.14	100	100	100	100	100	.	100	100	100	100
DAAQRH01	S. enteritidis	11	.	100	.	.	100	.	.	.	100	.	97.8	.	.	100	99.88	.	77.54	100	100	100	100	100	100	100	100	100	100	100	100	100	100	100	100	100	100	.	88.14	100	100	100	100	100	.	100	100	100	100
DAAQRJ01	S. enteritidis	11	.	100	.	.	100	.	.	.	100	.	97.8	.	.	100	99.88	.	77.54	100	100	100	100	100	100	100	100	100	100	100	100	100	100	100	100	100	100	.	88.14	100	100	100	.	100	.	100	100	100	100
DAAQRK01	S. enteritidis	11	.	100	.	.	100	.	.	.	100	.	97.8	.	.	100	99.88	.	77.54	100	100	100	100	100	100	100	100	100	100	100	100	100	100	100	100	100	100	.	88.14	100	100	100	100	100	.	100	100	100	100
DAAQRL01	S. enteritidis	11	.	100	.	.	100	.	.	.	100	.	97.8	.	.	100	99.88	.	77.54	100	100	100	100	100	100	100	100	100	100	100	100	100	100	100	100	100	100	.	88.14	100	100	100	100	100	.	100	100	100	100
DAAQRM01	S. enteritidis	11	.	100	.	.	100	.	.	.	100	.	97.8	.	.	100	99.88	.	77.54	100	100	100	100	100	100	100	100	100	100	100	100	100	100	100	100	100	100	.	88.14	100	100	100	100	100	.	100	100	100	100
DAAQRN01	S. enteritidis	11	.	100	.	.	100	.	.	.	100	.	97.8	.	.	100	99.88	.	77.54	100	100	100	100	100	100	100	100	100	100	100	100	100	100	100	100	100	100	.	88.14	100	100	100	100	100	.	100	100	100	100
DAAQRP01	S. enteritidis	1479	.	100	.	.	100	.	.	.	100	.	97.8	.	.	100	99.88	.	77.54	100	100	100	100	100	100	100	100	100	100	100	100	100	100	100	100	100	100	.	88.14	100	100	100	100	100	.	100	100	100	100
DAAQRQ01	S. enteritidis	11	.	100	.	.	100	.	.	.	100	.	97.8	.	.	100	99.88	.	77.54	100	100	100	100	100	100	100	100	100	100	100	100	100	100	100	100	100	100	.	88.14	100	100	100	100	100	.	100	100	100	100
DAAQRR01	S. enteritidis	11	.	100	.	.	100	.	.	.	100	.	97.8	.	.	100	99.88	.	77.54	100	100	100	100	100	100	100	100	100	100	100	100	100	100	100	100	100	100	.	88.14	100	100	100	100	100	.	100	100	100	100
DAAQRS01	S. enteritidis	11	.	100	.	.	100	.	.	.	100	.	97.8	.	.	100	99.88	.	77.66	100	100	100	100	100	100	100	100	100	100	100	100	100	100	100	100	100	100	.	88.14	100	100	100	100	100	.	100	100	100	100
DAAQRV01	S. enteritidis	11	.	100	.	.	100	.	.	.	100	.	97.8	.	.	100	99.88	.	100	100	100	100	100	100	100	100	100	100	100	100	100	100	100	100	100	100	100	.	88.14	100	100	100	100	100	.	100	100	100	81.54
DAAQRX01	S. enteritidis	11	.	100	.	.	100	.	.	.	100	.	97.8	.	.	100	99.88	.	77.54	100	100	100	100	100	100	100	100	100	100	100	100	100	100	100	100	100	100	.	88.14	100	100	100	100	100	.	100	100	100	100
DAAQRY01	S. enteritidis	11	.	100	.	.	100	.	.	.	100	.	97.8	.	.	100	99.88	.	77.54	100	100	100	100	100	100	100	100	100	100	100	100	100	100	100	100	100	100	.	88.14	100	100	100	100	100	.	100	100	100	100
DAAQSB01	S. enteritidis	11	.	100	.	.	100	.	.	.	100	.	97.8	.	.	100	99.88	.	77.54	100	100	100	100	100	100	100	100	100	100	100	100	100	100	100	100	100	100	.	88.14	100	100	100	100	100	.	100	100	100	100
DAAQSC01	S. enteritidis	11	.	100	.	.	100	.	.	.	100	.	97.8	.	.	100	99.88	.	77.54	100	100	100	100	100	100	100	100	100	100	100	100	100	100	100	100	100	100	.	88.14	100	100	100	100	100	.	100	100	100	100
DAAQSD01	S. enteritidis	11	.	100	.	.	100	.	.	.	100	.	97.8	.	.	100	99.88	.	77.54	100	100	100	100	100	100	100	100	100	100	100	100	100	100	100	100	100	100	.	88.14	100	100	100	100	100	.	100	100	100	100
DAAQSE01	S. enteritidis	11	.	100	.	.	100	.	.	.	100	.	97.8	.	.	100	99.88	.	77.54	100	100	100	100	100	100	100	100	100	100	100	100	100	100	100	100	100	100	.	88.14	100	100	100	100	100	.	100	100	100	100
DAAQSF01	S. enteritidis	11	.	100	.	.	100	.	.	.	100	.	97.8	.	.	100	99.88	.	77.54	100	100	100	100	100	100	100	100	100	100	100	100	100	100	100	89.37	100	100	.	88.14	100	100	100	100	100	.	100	100	100	100
DAAQSG01	S. enteritidis	11	.	100	.	.	100	.	.	.	100	.	97.8	.	.	100	99.88	.	100	100	100	100	100	100	100	100	100	100	100	100	100	100	100	100	100	100	100	.	88.14	100	100	100	100	100	.	100	100	100	100
DAAQSH01	S. enteritidis	11	.	100	.	.	100	.	.	.	100	.	97.8	.	.	100	99.88	.	77.54	100	100	100	100	100	100	100	100	100	100	100	100	100	100	100	100	100	100	.	88.14	100	100	100	100	100	.	100	100	100	100
DAAQSI01	S. enteritidis	11	.	100	.	.	100	.	.	.	100	.	97.8	.	.	100	99.88	.	77.54	100	100	100	100	100	100	100	100	100	100	100	100	100	100	100	100	100	100	.	88.14	100	100	100	100	100	.	100	100	100	100
DAAQSJ01	S. enteritidis	11	.	100	.	.	100	.	.	.	100	.	97.8	.	.	100	99.88	.	77.54	100	100	100	100	100	100	100	100	100	100	100	100	100	100	100	100	100	100	.	88.14	100	100	100	100	100	.	100	100	100	100
DAAQSK01	S. enteritidis	11	.	100	.	.	100	.	.	.	100	.	97.8	.	.	100	99.88	.	77.54	100	100	100	100	100	100	100	100	100	100	100	100	100	100	100	100	100	100	.	88.14	100	100	100	100	100	.	100	100	100	100
DAAQSL01	S. enteritidis	11	.	100	.	.	100	.	.	.	100	.	97.8	.	.	100	99.88	.	100	100	100	100	100	100	100	100	100	100	100	100	100	100	100	100	.	.	100	.	88.14	100	100	100	100	100	.	100	100	100	100
DAAQSM01	S. enteritidis	11	.	100	.	.	100	.	.	.	100	.	97.8	.	.	100	99.88	.	77.54	100	100	100	100	100	100	100	100	100	100	100	100	100	100	100	100	100	100	.	88.14	100	100	100	100	100	.	100	100	100	100
DAAQSN01	S. enteritidis	11	.	100	.	.	100	.	.	.	100	.	97.8	.	.	100	99.88	.	77.54	100	100	100	100	100	100	100	100	100	100	100	100	100	100	100	100	100	100	.	88.14	100	100	100	100	100	.	100	100	100	100
DAAQSO01	S. enteritidis	11	.	100	.	.	100	.	.	.	100	.	97.8	.	.	100	99.88	.	77.54	100	100	100	100	100	100	100	100	100	100	100	100	100	100	100	100	100	100	.	88.14	100	100	100	100	100	.	100	100	100	100
DAAQSP01	S. enteritidis	11	.	100	.	.	100	.	.	.	100	.	97.8	.	.	100	99.88	.	77.54	100	100	100	100	100	100	100	100	100	100	100	100	100	100	100	100	100	100	.	88.14	100	100	100	100	100	.	100	100	100	100
DAAQSQ01	S. enteritidis	11	.	100	.	.	100	.	.	.	100	.	97.8	.	.	100	99.88	.	77.54	100	100	100	100	100	100	100	100	100	100	100	100	100	100	100	100	100	100	.	88.14	100	100	100	100	100	.	100	100	100	100
DAAQSR01	S. enteritidis	11	.	100	.	.	100	.	.	.	100	.	97.8	.	.	100	99.88	.	77.54	100	100	100	100	100	100	100	100	100	100	100	100	100	100	100	100	100	100	.	88.14	100	100	100	100	100	.	100	100	100	100
DAAQST01	S. enteritidis	11	.	100	.	.	100	.	.	.	100	.	97.8	.	.	100	99.88	.	77.54	100	100	100	100	100	100	100	100	100	100	100	100	100	100	100	100	100	100	.	88.14	100	100	100	100	100	.	100	100	100	100
DAAQSV01	S. enteritidis	11	.	100	.	.	100	.	.	.	100	.	97.8	.	.	100	99.88	.	77.54	100	100	100	100	100	100	100	100	100	100	100	100	100	100	100	100	100	100	.	88.14	100	100	100	100	100	.	100	100	100	100
DAAQSW01	S. enteritidis	11	.	100	.	.	100	.	.	.	100	88.58	97.8	.	.	100	99.88	.	77.54	100	100	100	100	100	100	100	100	100	100	100	100	100	100	100	100	100	100	.	88.14	100	100	100	100	100	.	100	100	100	100
DAAQSX01	S. enteritidis	11	.	100	.	.	100	.	.	.	100	.	97.8	.	.	100	99.88	.	100	100	100	100	100	100	100	100	100	100	100	100	100	100	100	100	100	100	100	.	88.14	100	100	100	100	100	.	100	100	100	100
DAAQSY01	S. enteritidis	11	.	100	.	.	.	.	.	.	100	.	97.8	.	.	100	99.88	.	100	100	100	100	100	100	100	100	100	100	100	100	100	100	100	100	100	100	100	.	88.14	100	100	100	100	100	.	100	100	100	100
DAAQSZ01	S. enteritidis	11	.	100	.	.	100	.	.	.	100	.	97.8	.	.	100	99.88	.	100	100	100	100	100	100	100	100	100	100	100	100	100	100	100	100	100	100	100	.	88.14	100	100	100	100	100	.	100	100	100	100
DAAQTC01	S. enteritidis	11	.	.	.	.	.	.	.	.	.	.	.	.	.	100	.	.	.	100	100	100	100	100	100	100	100	100	99.96	100	100	100	100	100	.	100	100	.	100	100	100	100	100	100	.	100	100	100	100
DAAQTG01	S. enteritidis	11	.	.	.	.	.	.	.	.	.	.	.	.	.	100	.	.	.	100	100	100	100	100	100	100	100	100	100	100	100	100	100	100	100	100	100	.	88.14	100	100	100	100	100	.	100	100	100	100
DAAQTI01	S. enteritidis	11	.	.	.	.	.	.	.	.	.	.	.	.	.	100	.	.	.	100	100	100	100	100	100	100	100	100	100	100	100	100	100	100	.	100	100	.	100	100	100	100	100	100	.	100	100	100	100
DAAQTJ01	S. enteritidis	11	.	100	.	.	100	.	.	.	100	.	97.8	.	.	100	99.88	.	100	100	100	100	100	100	100	100	100	100	100	100	100	100	100	100	100	100	100	.	88.14	100	100	100	100	100	.	100	100	100	100
DAAQTL01	S. enteritidis	11	.	100	.	.	100	.	.	.	100	.	97.8	.	.	100	99.88	.	100	100	100	100	100	100	100	100	100	100	100	100	100	100	100	100	100	100	100	.	88.14	100	100	100	100	100	.	100	100	100	100
DAAQTO01	S. enteritidis	11	.	.	.	.	.	.	.	.	.	.	.	.	.	100	.	.	.	100	100	100	100	100	100	100	100	100	100	100	100	100	100	100	100	100	100	.	88.14	100	100	100	100	100	.	100	100	100	100
DAAQTR01	S. enteritidis	1479	.	.	.	.	.	.	.	.	.	.	.	.	.	100	.	.	.	100	100	100	100	100	100	100	100	100	100	100	100	100	100	100	100	100	100	.	88.14	100	100	100	100	100	.	100	100	100	100
DAAQTS01	S. enteritidis	11	.	.	.	.	.	.	.	.	.	.	.	.	.	100	.	.	.	100	100	100	100	100	100	100	100	100	100	100	100	100	100	100	.	.	100	.	100	100	100	100	100	100	.	100	100	100	100
DAAQTV01	S. enteritidis	11	.	100	.	.	100	.	.	.	100	.	97.8	.	.	100	99.88	.	77.54	100	100	100	100	100	100	100	100	100	100	100	100	100	100	100	100	100	100	.	88.14	100	100	100	100	100	.	100	100	100	100
DAAQTW01	S. enteritidis	11	.	100	.	.	100	.	.	.	100	.	97.8	.	.	100	99.88	.	77.54	100	100	100	100	100	100	100	100	100	100	100	100	100	100	100	100	100	100	.	88.14	100	100	100	100	100	.	100	100	100	100
DAAQTY01	S. enteritidis	11	.	100	.	.	100	.	.	.	100	.	97.8	.	.	100	99.88	.	77.66	100	100	100	100	100	100	100	100	100	100	100	100	100	100	100	100	100	100	.	88.14	100	100	100	100	100	.	100	100	100	100
DAAQTZ01	S. enteritidis	11	.	100	.	.	100	.	.	.	100	.	97.8	.	.	100	99.88	.	77.54	100	100	100	100	100	100	100	100	100	100	100	100	100	100	100	100	100	100	.	88.14	100	100	100	100	100	.	100	100	100	100
DAAQUC01	S. enteritidis	11	.	100	.	.	100	.	.	.	100	.	97.8	.	.	100	99.88	.	77.66	100	100	100	100	100	100	100	100	100	100	100	100	100	100	100	100	100	100	.	88.14	100	100	100	100	100	.	100	100	100	100
DAAQUE01	S. enteritidis	11	.	100	.	.	100	.	86.76	.	100	.	97.8	.	.	100	99.88	.	77.54	100	100	100	100	100	100	100	100	100	100	100	100	100	100	100	75.63	100	100	.	88.14	100	100	100	100	100	.	100	100	100	100
DAAQUG01	S. enteritidis	11	.	100	.	.	100	.	.	.	100	.	97.8	.	.	100	99.88	.	77.54	100	100	100	100	100	100	100	100	100	100	100	100	100	100	100	100	100	100	.	88.14	100	100	100	100	100	.	100	100	100	100
DAAQUI01	S. enteritidis	11	.	100	.	.	100	.	.	.	100	.	97.8	.	.	100	99.88	.	77.54	100	100	100	100	100	100	100	100	100	100	100	100	100	100	100	100	100	100	.	88.14	100	100	100	100	100	.	100	100	100	100
DAAQUP01	S. enteritidis	11	.	100	.	.	100	.	.	.	100	.	.	.	.	100	99.88	.	77.66	100	100	100	100	100	100	100	100	100	100	100	100	100	100	100	.	.	100	.	88.14	100	100	100	100	100	.	100	100	100	100
DAAQUQ01	S. enteritidis	11	.	100	.	.	100	.	.	.	100	.	97.8	.	.	100	99.88	.	77.54	100	100	100	100	100	100	100	100	100	100	100	100	100	100	100	100	100	100	.	88.14	100	100	100	100	100	.	100	100	100	100
DAAQUR01	S. enteritidis	11	.	100	.	.	89.97	.	82.97	.	.	.	97.8	.	.	100	97.39	.	75.03	100	100	100	100	100	100	100	100	100	100	100	100	100	.	.	.	.	100	.	88.14	100	100	100	100	100	.	100	100	100	.
DAAQUS01	S. enteritidis	1983	.	.	.	.	.	.	.	.	.	.	.	.	.	100	.	.	.	100	100	100	100	100	100	100	100	100	100	100	100	100	100	100	100	100	100	.	88.14	100	100	100	100	100	.	100	100	100	100
DAAQUT01	S. enteritidis	11	.	.	.	.	.	.	.	.	.	.	.	.	.	100	.	.	.	100	100	100	100	100	100	100	100	100	100	100	100	100	100	100	100	100	100	.	88.14	100	100	100	100	100	.	100	100	100	100
DAAQUU01	S. enteritidis	11	.	100	.	.	100	.	.	.	100	.	97.8	.	.	100	99.88	.	77.54	100	100	100	100	100	100	100	100	100	100	100	100	100	100	100	100	100	100	.	88.14	100	100	100	100	100	.	100	100	100	100
DAAQUV01	S. enteritidis	11	.	.	.	.	.	.	.	.	.	.	.	.	.	100	.	.	.	100	100	100	100	100	100	100	100	100	100	100	100	100	100	100	.	.	100	.	100	100	100	100	100	100	.	100	100	100	100
DAAQUW01	S. enteritidis	11	.	100	.	.	100	.	.	.	100	.	97.8	.	.	100	99.88	.	100	100	100	100	100	100	100	100	100	100	100	100	100	100	100	100	100	100	100	.	88.14	100	100	100	100	100	.	100	100	100	100
DAAQUX01	S. enteritidis	11	.	100	.	.	100	.	.	.	100	.	97.8	.	.	100	99.88	.	77.66	100	100	100	100	100	100	100	100	100	100	100	100	100	100	100	100	100	100	.	88.14	100	100	100	100	100	.	100	100	100	100
DAAQUY01	S. enteritidis	11	.	100	.	.	100	.	.	.	100	.	97.8	.	.	100	99.88	.	77.66	100	100	100	100	100	100	100	100	100	100	100	100	100	100	100	100	100	100	.	88.14	100	100	100	100	100	.	100	100	100	100
DAAQUZ01	S. enteritidis	1983	.	100	.	.	100	.	.	.	100	.	97.8	.	.	100	99.88	.	100	100	100	100	100	100	100	100	100	100	100	100	100	100	100	100	100	100	100	.	88.14	100	100	100	100	100	.	100	100	100	100
DAAQVA01	S. enteritidis	11	.	100	.	.	100	.	.	.	100	.	97.8	.	.	100	99.88	.	77.54	100	100	100	100	100	100	100	100	100	100	100	100	100	100	100	100	100	100	.	88.14	100	100	100	100	100	.	100	100	100	100
DAAQVB01	S. enteritidis	11	.	.	.	.	.	.	.	.	.	.	.	.	.	100	.	.	.	100	100	100	100	100	100	100	100	100	100	100	100	100	100	100	100	100	100	.	88.14	100	100	100	100	100	.	100	100	100	.
DAAQVC01	S. enteritidis	11	.	.	.	.	.	.	.	.	.	.	.	.	.	100	.	.	.	100	100	100	100	100	100	100	100	100	100	100	100	100	100	100	.	.	100	.	88.14	100	100	100	100	100	.	100	100	100	.
DAAQVD01	S. enteritidis	11	.	100	.	.	100	.	.	.	100	.	97.8	.	.	100	99.88	.	100	100	100	100	100	100	100	100	100	100	100	100	100	100	100	100	100	100	100	.	88.14	100	100	100	100	100	.	100	100	100	100
DAAQVE01	S. enteritidis	11	.	100	.	.	100	.	.	.	100	.	97.8	.	.	100	99.88	.	77.54	100	100	100	100	100	100	100	100	100	100	100	100	100	100	100	100	100	100	.	88.14	100	100	100	100	100	.	100	100	100	100
DAAQVF01	S. enteritidis	11	.	100	.	.	100	.	.	.	100	.	97.8	.	.	100	99.88	.	77.54	100	100	100	100	100	100	100	100	100	100	100	100	100	100	100	100	100	100	.	88.14	100	100	100	100	100	.	100	100	100	100
DAAQVG01	S. enteritidis	11	.	100	.	.	100	.	.	.	100	.	97.8	.	.	100	99.88	.	77.54	100	100	100	100	100	100	100	100	100	100	100	100	100	100	100	100	100	100	.	88.14	100	100	100	100	100	.	100	100	100	100
DAAQVH01	S. enteritidis	11	.	100	.	.	.	.	.	.	100	.	97.8	.	.	100	99.88	.	100	100	100	100	100	100	100	100	100	100	100	100	100	100	100	100	100	100	100	.	88.14	100	100	100	100	100	.	100	100	100	100
DAAQVI01	S. enteritidis	11	.	100	.	.	100	.	.	.	100	.	97.8	.	.	100	99.88	.	77.54	100	100	100	100	100	100	100	100	100	100	100	100	100	100	100	100	100	100	.	88.14	100	100	100	100	100	.	100	100	100	100
DAAQVJ01	S. enteritidis	11	.	100	.	.	100	.	.	.	100	.	97.8	.	.	100	99.88	.	100	100	100	100	100	100	100	100	100	100	100	100	100	100	100	100	100	100	100	.	88.14	100	100	100	100	100	.	100	100	100	.
DAAQVK01	S. enteritidis	11	.	100	.	.	100	.	.	.	100	.	97.8	.	.	100	99.88	.	77.54	100	100	100	100	100	100	100	100	100	100	100	100	100	100	100	100	100	100	.	88.14	100	100	100	100	100	.	100	100	100	100
DAAQVS01	S. enteritidis	11	.	.	.	.	.	.	.	.	.	.	.	.	.	100	.	.	.	100	100	100	100	100	100	100	100	100	100	100	100	100	100	100	100	100	100	.	88.14	100	100	100	100	100	.	100	100	100	100
DAAQVT01	S. enteritidis	11	.	.	.	.	.	.	.	.	.	.	.	.	.	100	.	.	.	100	100	100	100	100	100	100	100	100	100	100	100	100	100	100	100	100	100	.	88.14	100	100	100	100	100	.	100	100	100	100
DAAQVU01	S. enteritidis	11	.	100	.	.	.	.	.	.	.	.	97.8	.	.	100	99.88	.	100	100	100	100	100	100	100	100	100	100	100	100	100	100	100	100	100	100	100	.	88.14	100	100	100	100	100	.	100	100	100	100
DAAQVV01	S. enteritidis	1983	.	.	.	.	.	.	.	.	.	.	.	.	.	100	.	.	.	100	100	100	100	100	100	100	100	100	100	100	100	100	100	100	100	100	100	.	88.14	100	100	100	100	100	.	100	100	100	100
DAAQWD01	S. enteritidis	11	.	.	.	.	.	.	.	.	.	.	.	.	.	100	.	.	.	100	100	100	100	100	100	100	100	100	100	100	100	100	100	100	100	100	100	.	88.14	100	100	100	100	100	.	100	100	100	100
DAAQWF01	S. enteritidis	11	.	.	.	.	.	.	.	.	.	.	.	.	.	100	.	.	.	100	100	100	100	100	100	100	100	100	100	100	100	100	.	.	.	.	100	.	99.95	100	100	100	100	100	100	100	100	100	.
DAAQWG01	S. enteritidis	11	.	.	.	.	.	.	.	.	.	.	.	.	.	100	.	.	.	100	100	100	100	100	100	100	100	100	100	100	100	100	100	100	100	100	100	.	88.14	100	100	100	100	100	.	100	100	100	100
DAAQWH01	S. enteritidis	11	.	.	.	.	.	.	.	.	.	.	.	.	.	100	.	.	.	100	100	100	100	100	100	100	100	100	100	100	100	100	100	100	100	100	100	.	88.14	100	100	100	100	100	.	100	100	100	100
DAAQWI01	S. enteritidis	11	.	.	.	.	.	.	.	.	.	.	.	.	.	100	.	.	.	100	100	100	100	100	100	100	100	100	100	100	100	100	100	100	100	100	100	.	88.14	100	100	100	100	100	.	100	100	100	100
DAAQWJ01	S. enteritidis	11	.	.	.	.	.	.	.	.	.	.	.	.	.	100	.	.	.	100	100	100	100	100	100	100	100	100	100	100	100	100	100	100	100	100	100	.	88.14	100	100	100	100	100	.	100	100	100	100
DAAQWL01	S. enteritidis	11	.	.	.	.	.	.	.	.	.	.	.	.	.	100	.	.	.	100	100	100	100	100	100	100	100	100	100	100	100	100	100	100	100	100	100	.	88.14	100	100	100	100	100	.	100	100	100	100
DAAQWM01	S. enteritidis	11	.	.	.	.	.	.	.	.	.	.	.	.	.	100	.	.	.	100	100	100	100	100	100	100	100	100	100	100	100	100	100	100	81.28	.	100	.	100	100	100	100	100	100	.	100	100	100	100
DAAQWN01	S. enteritidis	11	.	.	.	.	.	.	.	.	.	.	.	.	.	100	.	.	.	100	100	100	100	100	100	100	100	100	100	100	100	100	100	100	100	100	100	.	88.14	100	100	100	100	100	.	100	100	100	100
DAAQWO01	S. enteritidis	11	.	100	.	.	.	100	.	.	.	.	97.8	.	.	100	99.88	97.01	100	100	100	100	100	100	100	100	100	100	100	100	100	100	100	100	100	100	100	.	88.14	100	100	100	100	100	.	100	100	100	100
DAAQWP01	S. enteritidis	11	.	100	.	.	.	100	.	.	.	.	97.8	.	.	100	99.88	97.01	100	100	100	100	100	100	100	100	100	100	100	100	100	100	100	100	100	100	100	.	88.14	100	100	100	100	100	.	100	100	100	.
DAAQWS01	S. enteritidis	11	.	.	.	.	.	.	.	.	.	.	.	.	.	100	.	.	.	100	100	100	100	100	100	100	100	100	100	100	100	100	100	100	100	100	100	.	88.14	100	100	100	100	100	.	100	100	100	100
DAAQWT01	S. enteritidis	11	.	.	.	.	.	.	.	.	.	.	.	.	.	100	.	.	.	100	100	100	100	100	100	100	100	100	100	100	100	100	100	100	100	100	100	.	88.14	100	100	100	100	100	.	100	100	100	100
DAAQWU01	S. enteritidis	11	.	.	.	.	.	.	.	.	.	.	.	.	.	100	.	.	.	100	100	100	100	100	100	100	100	100	100	100	100	100	100	100	100	100	100	.	88.14	100	100	100	100	100	.	100	100	100	100
DAAQWV01	S. enteritidis	11	.	.	.	.	.	.	.	.	.	.	.	.	.	100	.	.	.	100	100	100	100	100	100	100	100	100	100	100	100	100	100	100	100	100	100	.	88.14	100	100	100	100	100	.	100	100	100	100
DAARFW01	S. enteritidis	11	.	100	.	.	.	100	.	.	.	.	97.8	.	.	100	99.88	97.01	100	100	100	100	100	100	100	100	100	100	100	100	100	100	100	100	100	100	100	.	88.14	100	100	100	100	100	.	100	100	100	.
DAARJA01	S. enteritidis	11	.	.	.	.	.	.	.	.	.	.	.	.	.	100	.	.	.	100	100	100	100	100	100	100	100	100	100	100	100	100	100	100	100	100	100	.	88.14	100	100	100	100	100	.	100	100	100	100
DAARNE01	S. enteritidis	11	.	100	.	.	.	100	.	.	.	.	97.8	.	.	100	99.88	97.01	100	100	100	100	100	100	100	100	100	100	100	100	100	100	100	100	100	100	100	.	88.14	100	100	100	100	100	.	100	100	100	.
DAARNI01	S. enteritidis	11	.	.	.	.	.	.	.	.	.	.	.	.	.	100	.	.	.	100	100	100	100	100	100	100	100	100	100	100	100	100	100	100	100	100	100	.	88.14	100	100	100	100	100	.	100	100	100	100
DAARNM01	S. enteritidis	11	.	.	.	.	.	.	.	.	.	.	.	.	.	100	.	.	.	100	100	100	100	100	100	100	100	100	100	100	100	100	100	100	100	100	100	.	88.14	100	100	100	100	100	.	100	100	100	100
DAARNV01	S. enteritidis	11	.	.	.	.	.	.	.	.	.	.	97.8	.	.	100	.	.	.	100	100	100	100	100	100	100	100	100	100	100	100	100	100	100	100	100	100	.	88.14	100	100	100	100	100	.	100	100	100	100
DAARWC01	S. enteritidis	11	.	.	.	.	.	.	.	.	.	.	.	.	.	100	.	.	.	100	100	100	100	100	100	100	100	100	100	100	100	100	100	100	100	100	100	.	88.14	100	100	100	100	100	.	100	100	100	100
DAARWF01	S. enteritidis	11	.	100	.	.	100	.	.	.	100	.	97.8	.	.	100	99.88	.	100	100	100	100	100	100	100	100	100	100	100	100	100	100	100	100	100	100	100	.	88.14	100	100	100	100	100	.	100	100	100	81.54
DAASAW01	S. enteritidis	11	.	.	.	.	.	.	.	.	.	.	.	.	.	100	.	.	.	100	100	100	100	100	100	100	100	100	100	100	97.35	100	100	100	100	100	100	.	88.14	100	100	100	100	100	.	100	100	100	.
DAASUJ01	S. enteritidis	11	.	.	.	.	.	.	.	.	.	.	.	.	.	100	.	.	.	100	100	100	100	100	100	100	100	100	100	100	97.35	100	100	100	100	100	100	.	88.14	100	100	100	100	100	.	100	100	100	100
DAASZH01	S. enteritidis	11	.	.	.	.	.	.	.	.	.	.	.	.	.	100	.	.	.	100	100	100	100	100	100	100	100	100	100	100	97.35	100	100	100	100	100	100	.	88.14	100	100	100	100	100	.	100	100	100	.
DAATAE01	S. enteritidis	1983	.	.	.	.	.	.	.	.	.	.	.	.	.	100	.	.	.	100	100	100	100	100	100	100	100	100	100	100	100	100	100	100	81.28	.	100	.	100	100	100	100	100	100	.	100	100	100	100
DAATAG01	S. enteritidis	11	.	.	.	.	.	.	.	.	.	.	.	.	.	100	.	.	.	100	100	100	100	100	100	100	100	100	100	100	100	100	100	100	100	100	100	.	88.14	100	100	100	100	100	.	100	100	100	100
DAATBC01	S. enteritidis	11	.	100	.	.	.	100	.	.	.	.	97.8	.	.	100	99.88	100	100	100	100	100	100	100	100	100	100	100	100	100	100	100	100	100	100	100	100	.	88.14	100	100	100	100	100	.	100	100	100	100
DAATCZ01	S. enteritidis	11	.	100	.	.	.	100	.	.	.	.	97.8	.	.	100	99.88	100	100	100	100	100	100	100	100	100	100	100	100	100	100	100	100	100	100	100	100	.	88.14	100	100	100	100	100	.	100	100	100	.
DAATDJ01	S. enteritidis	11	.	.	.	.	.	.	.	.	.	.	.	.	.	100	.	.	.	100	100	100	100	100	100	100	100	100	100	100	100	100	100	100	100	100	100	.	88.14	100	100	100	100	100	.	100	100	100	100
DAATDK01	S. enteritidis	11	.	.	.	.	.	.	.	.	.	.	.	.	.	100	.	.	.	100	100	100	100	100	100	100	100	100	100	100	100	100	100	100	100	100	100	.	88.14	100	100	100	100	100	.	100	100	100	100
DAATDO01	S. enteritidis	11	.	.	.	.	.	.	.	.	.	.	.	.	.	100	.	.	.	100	100	100	100	100	100	100	100	100	100	100	100	100	100	100	100	100	100	.	88.14	100	100	100	100	100	.	100	100	100	100
DAATDP01	S. enteritidis	11	.	.	.	.	.	.	.	.	.	.	.	.	.	100	.	.	.	100	100	100	100	100	100	100	100	100	100	100	100	100	100	100	100	100	100	.	88.14	100	100	100	100	100	.	100	100	100	100
DAATDQ01	S. enteritidis	11	.	100	.	.	.	100	.	.	.	.	97.8	.	.	100	99.88	100	100	100	100	100	100	100	100	100	100	100	100	100	100	100	100	100	100	100	100	.	88.14	100	100	100	100	100	.	100	100	100	.
DAATDT01	S. enteritidis	11	.	.	.	.	.	.	.	.	.	.	.	.	.	100	.	.	.	100	100	100	100	100	100	100	100	100	100	100	100	100	100	100	100	100	100	.	88.14	100	100	100	100	100	.	100	100	100	100
DAATUX01	S. enteritidis	11	.	100	.	.	.	100	.	.	.	.	97.8	.	.	100	99.88	100	100	100	100	100	100	100	100	100	100	100	100	100	100	100	100	100	100	100	100	.	88.14	100	100	100	100	100	.	100	100	100	.
DAAWEO01	S. enteritidis	11	.	.	.	.	.	.	.	.	.	.	.	.	.	100	.	.	.	100	100	100	100	100	100	100	100	100	100	100	100	100	100	100	100	100	100	.	88.14	100	100	100	100	100	.	100	100	100	100
DAAWEQ01	S. enteritidis	11	.	.	.	.	.	.	.	.	.	.	.	.	.	100	.	.	.	100	100	100	100	100	100	100	100	100	100	100	100	100	100	100	100	100	100	.	88.14	100	100	100	100	100	.	100	100	100	100
DAAWER01	S. enteritidis	11	.	.	.	.	.	.	.	.	.	.	97.8	.	.	100	.	.	.	100	100	100	100	100	100	100	100	100	100	100	100	100	100	100	100	100	100	.	88.14	100	100	100	100	100	.	100	100	100	100
DAAWIC01	S. enteritidis	11	.	.	.	.	.	.	.	.	.	.	.	.	.	100	.	.	.	100	100	100	100	100	100	100	100	100	100	100	100	100	100	100	100	100	100	.	88.14	100	100	100	100	100	.	100	100	100	100
DACZMJ01	S. enteritidis	11	.	100	.	.	100	.	.	.	100	.	97.8	.	.	100	99.88	.	100	100	100	100	100	100	100	100	100	100	100	100	100	100	100	100	100	100	100	.	88.14	100	100	100	100	100	.	100	100	100	81.54
DACZOC01	S. enteritidis	136	.	.	.	.	.	.	.	.	.	.	.	.	.	100	.	.	.	100	100	100	100	100	100	100	100	100	100	100	97.35	100	100	100	100	100	100	.	88.14	100	100	100	100	100	.	100	100	100	.
DACZOD01	S. enteritidis	136	.	.	.	.	.	.	.	.	.	.	.	.	.	100	.	.	.	100	100	100	100	100	100	100	100	100	100	100	97.35	100	100	100	100	100	100	.	88.14	100	100	100	100	100	.	100	100	100	100
DACZOE01	S. enteritidis	136	.	.	.	.	.	.	.	.	.	.	.	.	.	100	.	.	.	100	100	100	100	100	100	100	100	100	100	100	97.35	100	100	100	100	100	100	.	88.14	100	100	100	100	100	.	100	100	100	.
[truncated: 84 more columns]
